# Supplementary material for: Single-cell transcriptome analysis reveals subtype-specific clonal evolution and microenvironmental changes in liver metastasis of pancreatic adenocarcinoma and their clinical implications
Source: Springer Nature journal article supplement (doi:10.1186/s12943-024-02003-0), 2024-05-03
Supplement: MOESM1 [file 12943_2024_2003_MOESM1_ESM.pdf]

Supplementary Information for

**Single-cell transcriptome analysis reveals subtype-specific clonal evolution and microenvironmental changes in liver metastasis of pancreatic adenocarcinoma and their clinical implications**

Joo Kyung Park, Hyung-oh Jeong, Hyemin Kim, Jin Ho Choi, Eun Mi Lee, Seunghoon Kim, Jinho Jang, David Whee-Young Choi, Se-Hoon Lee, Kyoung Mee Kim, Kee-Taek Jang, Kwang Hyuck Lee, Kyu Taek Lee, Min Woo Lee\*, Jong Kyun Lee\*, and Semin Lee\*

\*Corresponding authors.

Email: leeminwoo0@gmail.com, jongk.lee@samsung.com, seminlee@unist.ac.kr

## 1 **Supplementary Results**

### 2 **Determination of PDAC subtypes**

3 According to the gene set enrichment analysis (GSEA) of NMF signature genes, NMF-1  
4 showed significant activation of cell cycle-related pathways, such as 'G2-M Checkpoint' and  
5 'E2F Targets' (Fig. 1B). NMF-1 characteristics were very similar to the 'cycling' cell state  
6 reported by Krieger et al [1]. We observed significant upregulation of 'cycling' state-associated  
7 genes such as *CDK1*, *MKI67*, and *PCNA* (Fig. S2C, Table S3). Interestingly, the proportion of  
8 NMF-1 gradually increased as PDAC progressed and metastasized (Fig. S3A).

9 Ductal cells classified into NMF-2 were mostly identified as 'classical' subtypes (Fig. 1B).  
10 For further validation, we calculated signature scores based on previously reported PDAC  
11 subtypes for our NMF-based programs. The scores for both 'classical signature 1' defined by  
12 Chan-Seng-Yue et al [2] and 'classical' defined by Collison et al [3] were high in NMF-2 (Fig.  
13 S2D). Furthermore, we observed the highest overlap of signature genes between NMF-2 and  
14 the 'classical' subtype defined by Moffit et al [4] (Fig. S3B). GSEA analysis showed that  
15 'IL-2/STAT5 Signaling', 'Inflammatory Response', and 'Epithelial-Mesenchymal Transition  
16 (EMT)' pathways were significantly elevated in NMF-2 (Fig. 1B).

17 Most of the ductal cells defined as 'exocrine-like' based on Collison et al [3] were classified  
18 into NMF-3 (Fig. 1B). The signature genes of NMF-3 considerably overlapped with those of  
19 'endocrine/exocrine pancreas signature 5' defined by Chan-Seng-Yue et al [2] and 'ADEX'  
20 subtype defined by Bailey et al [5] (Fig. S3B). Moreover, the signature scores of three  
21 exocrine subtypes classified by Chan-Seng-Yue et al [2], Bailey et al [5] and Collison et al [3]  
22 were highest in NMF-3 (Fig. S2E). 'Bile Acid Metabolism' pathways were significantly elevated

23 in NMF-3 (Fig. 1B), as previously reported by Collison et al [3]. Also, NMF-3 proportions were  
24 significantly higher in Pm0 than in Pm1 and Lm (Fig. S3A).

25 Lastly, NMF-4 was primarily matched with the previously reported 'basal-like' subtype (Fig. 1B).  
26 The signature scores for 'basal-like' subtypes defined by Moffitt et al [4] and the 'basal-like  
27 signature 2' suggested by Chan-Seng-Yue et al [2] were both highest in NMF-4 (Fig. S2F). NMF-  
28 4 signature genes also best coincided with 'basal-like signature 2' genes defined by Chan-Seng-  
29 Yue et al [2] and 'basal-like' signature genes defined by Moffitt et al [4] (Fig. S3B). Furthermore,  
30 NMF-4 signature genes were enriched with 'EMT', 'Apical Surface', and 'TGF-beta Signaling'  
31 pathways (Fig. 1B).

32

### 33 **Supplementary Methods**

#### 34 **Study patients**

35 Patients clinically suspected to have PDAC were admitted for workup, and pathologically  
36 confirmed cases were prospectively enrolled in the Samsung Medical Center (SMC)  
37 Pancreatic Cancer Cohort. Primary PDAC specimens and metastatic liver specimens were  
38 obtained from 21 treatment naïve patients with PDAC. All patients provided written informed  
39 consent, and all samples were collected according to IRB regulations and approval (IRB No.  
40 2014-04-061). In addition, we collected clinical data using electronic medical records  
41 regarding the patients age, sex, body mass index (BMI), Eastern Cooperative Oncology  
42 Group (ECOG) performance status, comorbidity (cardiovascular, chronic kidney disease, liver  
43 cirrhosis, other cancer, or diabetes mellitus), serum CEA level and CA 19-9 level at the  
44 diagnosis of PDAC. Tumor stage (according to the 8th edition AJCC guidelines), tumor size,

45 metastatic site, treatment course, and survival data were also reviewed. Ethical approval was  
46 obtained from the institutional review board of Samsung Medical Center (IRB No. 2014-04-  
47 061, 2016-05-011). Provenance and peer review Not commissioned, externally peer  
48 reviewed.

49

### 50 **Sample acquisition from primary PDAC using EUS-FNB**

51 All EUS-FNB procedures were performed under conscious sedation by the same experienced  
52 endosonographer (JKP) with fanning techniques sampling multiple areas within a lesion with  
53 each pass. GF-JE160-AL linear EUS apparatus (Olympus, Tokyo, Japan) equipped with an  
54 Aloka ProSound SSD 5000 processor (Wallingford, CT, USA) was used in all cases. EUS-  
55 FNB was performed using a linear array echoendoscope (Olympus, Tokyo, Japan) and a 22  
56 G Acquire® FNB needle (Boston Scientific Co.). The slow-pull technique was used to remove  
57 the stylet and was followed by the application of 5 mL negative pressure for 5–10 seconds,  
58 during which at least 10 additional actuations were performed. A transgastric method was  
59 utilized for lesions in the pancreas body or tail, and a transduodenal approach was used for  
60 lesions in the head or uncinate process. For tissue retrieval, a stylet was introduced into the  
61 needle, or a 5-10 ml air-filled syringe was inserted into the needle. Normal tissue was  
62 obtained adjacent normal pancreas before approaching to tumor tissue. The extruded  
63 material was placed onto glass slides for primary gross inspection. EUS-FNB specimens were  
64 smeared on slides and fixed with 96% ethanol for cytological analysis. Other samples were  
65 placed in 10% formalin solution for histological analysis.

66

67 **Percutaneous biopsy for hepatic metastasis**

68 Liver biopsy was performed at the same day or the next day of EUS-FNB for patients with  
69 metastatic PDAC. All liver biopsy procedures were performed percutaneously by a board-  
70 certified abdominal radiologist (MWL). Before the procedure, the radiologist carefully reviewed  
71 the CT or MR images, and the patients were positioned appropriately for the procedure based  
72 on the tumor location. In general, if the target tumor was in the liver dome, and thus the  
73 sonographic window was affected by the lung or rib shadow, the semi-erect position using a  
74 tilting table was preferred to enhance the sonographic window [6]. If not, a supine position  
75 was used for the procedure. The target lesion was localized using fusion imaging (Volume  
76 Navigation, Logiq E9, or Logiq E10; GE Healthcare, Waukesha, Wisconsin) of the real-time  
77 US and pre-acquired CT/MR images [7]. Local anesthesia was performed along the expected  
78 needle path between the skin and hepatic capsule using 2% lidocaine hydrochloride (Huons,  
79 Hwaseong, Korea). Percutaneous biopsy was performed using an 18-gauge automated  
80 biopsy needle (Acecut; TSK Laboratory, Tochigi, Japan) with the free-hand technique. A co-  
81 axial guide needle was routinely used to obtain sufficient tissue cores by repeated biopsy.

82

83 **Isolation of single cell from the specimens**

84 All remaining tissues are collected in MACS<sup>®</sup> Tissue Storage Solution (Miltenyi Biotec.,  
85 Auburn, CA, USA) on ice, and processed to the single cell dissociation immediately.  
86 Specimens were maintained in MACS<sup>®</sup> Tissue Storage Solution (Miltenyi Biotec.) during  
87 delivery on ice, and immediately processed for single cell isolation. Biopsy tissues are placed  
88 on a petri dish with a small volume of enzyme mixture solution (Tumor Dissociation Kit,

89 Miltenyi Biotec.), and minced into small pieces under 1-2 mm with surgical blades. Minced  
90 pieces are transferred to gentleMACS™ C-tube containing enzyme mixture solution. By  
91 choosing an appropriate program of gentleMACS™ Dissociator, tissue pieces are further  
92 dissociated three times with two interval incubations for 30 minutes at 37°C under continuous  
93 rotation using the MACSmix™ Tube Rotator. Resuspended samples are applied to a cell  
94 strainer (70 µm) and washed with 10 ml of DMEM/F12 media with 1% FBS. After a  
95 centrifugation at 400xg for 5 minutes, cells were resuspended in an appropriate volume of  
96 media and counted with trypan blue staining or acridine orange/ propidium iodide staining.  
97 Optionally, erythrocytes are removed by red blood cell lysis solution for 10 min before  
98 counting.

99

## 100 **Single-cell RNA sequencing**

101 We initiated the cell preparation process by employing the LUNA-FL™ Automated  
102 Fluorescence Cell Counter (logos biosystems). Detailed guidelines for cell preparation were  
103 sourced from the 10x Genomics Single Cell Protocols Cell Preparation Guide and the  
104 Guidelines for Optimal Sample Preparation flowchart. Libraries were meticulously constructed  
105 using the Chromium controller in accordance with the 10x Chromium Next GEM Single Cell 3'  
106 v3.1 protocol (10x Genomics). In brief, cell suspensions were diluted in nuclease-free water,  
107 aiming to achieve a targeted cell count of 10,000. The diluted cell suspension was mixed with  
108 a master mix and subsequently loaded onto a Chromium Next GEM chip, along with Single  
109 Cell 3' V3.1 gel beads and partitioning oil. Within the droplets formed in the chip, RNA  
110 transcripts from individual cells underwent unique barcoding and reverse transcription. Pooled  
111 cDNA molecules then underwent sequential processes, including end repair, addition of a

112 single 'A' base, and adapter ligation. Subsequently, the resulting products were subjected to  
113 purification and enrichment through polymerase chain reaction (PCR), ultimately yielding the  
114 final cDNA library. To ensure library quality and quantify the purified libraries, we adhered to  
115 the qPCR Quantification Protocol Guide (KAPA). Furthermore, library qualification was  
116 performed using the Agilent Technologies 4200 TapeStation from Agilent Technologies. The  
117 sequenced libraries were processed using the HiSeqX platform from Illumina to obtain the  
118 requisite data for our study.

119

## 120 **Single-cell RNA sequencing data processing and analysis**

121 Gene-Barcode matrices are produced using CellRanger v.3.0.2 (10x Genomics) pipeline with  
122 default parameters. Reads were aligned to the GRCh38 reference genome using the STAR  
123 algorithm [8]. To ensure the quality of the single-cell RNA-sequencing data, we implemented  
124 a filtering step at the individual sample level to remove low-quality cells. This filtering step was  
125 based on the number of expressed genes (average number of genes = 1,063) and the  
126 proportion of mitochondrial genes per cell (< 20%). Seurat [9] package was used for  
127 downstream analyses. The gene expression matrix for each cell was normalized using  
128 *NormalizeData* functions. The cell-cycle scores for each cell were calculated using the  
129 *CellCycleScoring* function, and expression of genes were scaled using the *ScaleData*  
130 function, which regresses on the total of UMI, fraction of mitochondria, and cell-cycle scores.  
131 The top 2,000 variable genes were selected through the *FindVariableFeatures* function, and  
132 dimensionality reduction was performed through the *RunPCA* function. For dimensionality  
133 reduction and clustering analysis, we used the *FindNeighbours* and *FindClusters* functions,  
134 and the optimal dimensionality was determined by *JackStraw* and *ElbowPlot* functions. We

135 used the *RunTSNE* function to project the cells into a two-dimensional space. To estimate the  
136 cell type of each cluster, we used the singleR [10] package and verified the expression levels  
137 of well-known cell type markers (ductal cells: *KRT19*, *AMBP*, *EPCAM*; fibroblasts: *COL1A1*,  
138 *COL1A2*, *COL3A1*; acinar cells: *PRSS1*, *CTRB1*, *CTRB2*; endothelial cells: *PLVAP*, *CLDN5*,  
139 *VWF*; T cells: *CD3D*, *IL7R*, *TCF7*; myeloid cells: *LYZ*, *CD14*, *C1QA*; B cell: *CD79A*, *MS4A1*,  
140 *CD79B*; naive T (Tn) cells: *SELL* and *IL7R*; helper T (Th) cells: *CD4* and *IL6R*; regulatory T  
141 cells (Tregs): *FOXP3* and *TNFRSF4*; cytotoxic T (Tc) cells: *CD8A* and *GZMK*; exhausted T  
142 (Tex) cells: *CTLA4* and *LAG3*; natural killer (NK) cells: *NCR3* and *NCAM1*). For sub-clustering  
143 by major cell type, we used the method described above and additionally removed potential  
144 doublets [11]. Differentially expressed genes were identified using the *FindMarkers* function  
145 on a normalized gene expression matrix. The raw gene expression matrix was used as a  
146 reference to deconvolve the spatial transcriptome data published by Zhou et al. [12] The  
147 deconvolution analysis was performed using RCTD [13] with `doublet_mode` set to "full".

148

#### 149 **Correction for ambient RNA contamination**

150 During the process of isolating cells from a tissue sample, some cells may lyse because the  
151 conditions for dissociation are specific to each cell type [14]. We used SoupX [14] with default  
152 parameters to estimate and correct for cell-free mRNA contamination. Cell-free mRNA  
153 contamination was estimated and corrected in each sample.

154

#### 155 **Curated doublet removal**

156 A scrublet [15] is used to infer doublets that may occur in the scRNA-seq process. The  
157 scrublet was processed independently for each sample as redundancy is determined through  
158 simulation. All parameters in scrublet were set to default and doublets were determined by the  
159 thresholds suggested by scrublet.

160

### 161 **Identification of PDAC subtypes by cNMF**

162 We defined specific transcript modules of the ductal cell using cNMF [16]. Through Seurat's  
163 *NormalizeData* function, cNMF received the normalized UMI count matrix of ductal cells as  
164 input, and the number of components ( $k$ ) was set to a value between 2 and 15. We  
165 determined the optimal  $k$  based on the silhouette score and the Frobenius error, which  
166 measures the stability of the component.

167

### 168 **Copy number variation estimation**

169 To infer CNV at the single-cell level, we used copy number karyotyping of aneuploid tumors  
170 (CopyKAT [17]) was used. All parameters of CopyKat were set to default, and ductal cells  
171 with less than 3,000 genes were removed to identify clearer CNVs. CNV of ductal cells was  
172 estimated using myeloid cells as normal cells. To identify genomic regions that were  
173 significantly amplified or deleted between groups, we used the proportion of cells (> 70%) that  
174 exceeded a specific CNV threshold (absolute CNV score > 0.05) at the sample level. We also  
175 identified a significant difference in the frequency of CNV events between groups using the  
176 Fisher's exact test.

177

## 178 **Modular score calculation**

179 Seurat's *AddModuleScore* function is used to calculate the gene expression module score for  
180 each cell. To determine the characteristics of NMF subtypes, we used the signature genes of  
181 the previously reported subtypes [2-5]. Regulatory, cytotoxic, and dysfunctional scores for T  
182 cells were determined using the gene set defined in Li et al. [18].

183

## 184 **Gene set enrichment analysis**

185 To investigate the differential EMT mechanisms between the basal-like and classical  
186 subtypes, we performed pseudo-bulk differential expression analysis using the raw UMI count  
187 sum of each sample. DESeq2 was used to identify differentially expressed genes by  
188 comparing each origin with other origins of the same subtype. Gene set enrichment analysis  
189 was performed using the "MSigDB\_Hallmark\_2020" database for genes that passed the  
190 criteria of fold change > 1.5 and p-value < 0.05 [19].

191

## 192 **Constructing single cell trajectories**

193 We estimate single cell trajectories using Monocle2 [20]. The Gene-Barcode matrix was  
194 normalized using the *EstimateSizeFactors* function and the variance of each gene was  
195 estimated using the *EstimateDispersions* function. We use DEGs identified through Seurat's

196 *FindAllMarkers* to sort cells. Afterwards, the dimension was reduced using *DDRTree*, and  
197 cells were sorted according to pseudotime through the *orderCells* function.

198

### 199 **Cell-cell communication analysis based on ligand-receptor pairs**

200 CellPhoneDB is an analytical tool that can infer potential receptor-ligand interactions based  
201 on the expression of receptors of one cell type and ligands of another cell type [21]. To  
202 identify the most relevant interactions between cell types, CellPhoneDB performs an  
203 interaction analysis by randomly substituting each cell type. Our results are analyzed by  
204 applying basic parameters.

205

### 206 **Survival analysis**

207 We conducted a Kaplan–Meier survival analysis to investigate the effect of the proportion of  
208 ductal cell subtype on patient survival using the *survival* and the *survminer* R packages. To  
209 validate our results, we also exploited the previously published scRNA-seq data from  
210 treatment naïve PDAC patient from Hwang et al. [22] and Zhou et al. [12], and bulk RNA-seq  
211 data of TCGA PDAC [23] patients. The proportion of NMF subtypes for each patient with  
212 TCGA PDAC was estimated using MuSiC [24]. MuSiC characterizes cellular type composition  
213 in bulk RNA-seq data from complex tissues by assigning weights to genes that exhibit inter-  
214 individual and inter-cellular consistency in scRNA-seq data. The UMI count of ductal cells  
215 defined in the SMC cohort was used to estimate the subtype proportions of TCGA PDAC  
216 samples. In addition, DEGs between subtypes were detected using Seurat's *FindAllMarkers*

217 function, and deconvolution was performed with genes with  $p\_val\_adj < 0.05$  and  $avg\_logFC$   
218  $> 0.25$ . Survival analysis was performed between the groups with high and low scores based  
219 on the estimated basal-like proportions of each sample, with the threshold increasing from 0.1  
220 to 0.5 by 0.01. However, to reduce the effect of the imbalanced sample size in the grouping  
221 process, survival analysis was not performed if the number of samples in each group was  
222 less than 10% of the total samples. Multivariate Cox regression analysis was performed on  
223 the three PDAC scRNA-seq datasets (SMC, WashU, and MGH cohorts) using *coxph* function  
224 in survival R package. The covariates considered in this analysis encompassed age, gender  
225 (male and female), tumor stage (stage 2 and 3), and the proportion of NMF subtypes.

226

#### 227 **Transcription factor-target gene regulatory network analysis**

228 Regulon analysis was investigated using SCENIC [25], an R package that analyzes the co-  
229 expression of transcription factors and their putative target genes. We assigned regulon  
230 activity scores using SCENIC's default parameters from the raw UMI count matrix. These  
231 scores were then used to construct co-expression networks. Regulon activity for each group  
232 was calculated as the average regulon activity score across all cells in the group.

233

#### 234 **Multiplex immunohistochemical assay (mIHC)**

235 Further analysis of interaction between Treg and ductal cells, mIHC was done with core  
236 biopsy of liver metastases (Lm), however, Pm0 tissue from EUS FNB were not sufficient  
237 enough for mIHC and surgically resected Pm0 tissues were used. Formalin-fixed, paraffin-

238 embedded (FFPE) tissue sections were immunostained using the Opal Polaris 7 Color IHC  
239 Detection Kit (Akoya Biosciences, Marlborough, MA, USA), which uses individual tyramide  
240 signal amplification (TSA)-conjugated fluorophores to detect various targets, on the BOND RX  
241 autostainer (Leica Biosystems) and the following anti-human antibodies: panCytokeratin  
242 (DAKO, #M3515), FOXP3 (Abcam, # ab20034), CD8 (Ventana, #790-4460), LGALS9  
243 (ThermoFisher, #CF806323), CD44 (Abcam, #ab157107), IGF2 (ThermoFisher, #MA5-  
244 17096), IGF2R (Abcam, #ab124767), AREG (Abcam, #ab234750), ICAM1 (ThermoFisher,  
245 #MA5407), S100A2 (Abcam, #ab109494), and S100A9 (Abcam, #ab63818). Each antibody  
246 was tested individually for its optimal position in the sequence of multiplex staining to  
247 minimize interference with previous antibody-TSA complexes or by alteration of epitopes.

248 Specifically, 4- $\mu$ m-thick sections were deparaffinized on the Leica BOND-RX automated  
249 immunostainer (Leica Microsystems, Milton Keynes, UK) by baking for 30 min at 60 °C,  
250 soaking in BOND dewax Solution at 72 °C and then rehydrating in ethanol. Antigen retrieval  
251 was performed in heated citrate buffer (pH 6.0) and/or Tris-EDTA buffer (pH 9) for 30 min,  
252 sections were fixed with 7.5% neutralized formaldehyde (SAV Liquid Production GmbH).  
253 Each section was subjected to 5-6 successive rounds of antibody staining, each consisting of  
254 protein blocking with 20% normal goat serum (Dako) in PBS, incubation with primary Abs,  
255 biotinylated anti-mouse/rabbit secondary antibodies and Streptavidin-HRP (Dako, 50003),  
256 followed by TSA visualization with fluorophores Opal 520, Opal 540, Opal 570, Opal 620,  
257 Opal 650, and Opal 690 (PerkinElmer) diluted in 1X Plus Amplification Diluent (PerkinElmer),  
258 antibody-TSA complex-stripping in heated citrate buffer (pH 6.0) and/or Tris-EDTA buffer (pH  
259 9) for 30 min and fixation with 7.5% neutralized formaldehyde. Thereafter, nuclei were  
260 counterstained with DAPI (PerkinElmer), and sections were mounted with PermaFluor  
261 fluorescence mounting medium (Thermo Fisher Scientific). Autofluorescence (negative

262 control) slides were also included, using primary and secondary antibodies and omitting the  
263 fluor tyramides. Whole slides were scanned using the Vectra-Polaris 3.0.3, a multispectral  
264 imaging system (Akoya Biosciences), at a low magnification of 10×. Quantification analysis  
265 and image capture were performed with InForm 2.6.0. and Phenochart 1.0.9 image viewer  
266 software (Akoya Biosciences).

## Supplementary Tables

**Table S1. Baseline characteristics of study patients.**

| Characteristics                            | N = 21               |
|--------------------------------------------|----------------------|
| Age, median (range)                        | 61 (50-73)           |
| Sex, n (%)                                 |                      |
| Male                                       | 8 (38%)              |
| Female                                     | 13 (62%)             |
| BMI (kg/m <sup>2</sup> ), median (range)   | 21.8 (16.0-29.1)     |
| Performance status (ECOG), n (%)           |                      |
| 0: fully active                            | 0 (0)                |
| 1: light house work                        | 19 (90%)             |
| 2: ambulatory                              | 1 (5%)               |
| 3: limited self-care                       | 1 (5%)               |
| DM (at the time of diagnosis)              |                      |
| Yes                                        | 6 (29%)              |
| No                                         | 15 (71%)             |
| Pancreas mass (mm), median (range)         | 37 (20.0-80.0)       |
| Location (proximal), n (%)                 |                      |
| Uncinate/Head/Neck                         | 13 (62%)             |
| Body                                       | 2 (10%)              |
| Tail                                       | 6 (28%)              |
| Stage (AJCC 8 <sup>th</sup> ), n (%)       |                      |
| III                                        | 6 (29%)              |
| IV                                         | 15 (71%)             |
| Metastasis, n (%)                          |                      |
| No metastasis                              | 6 (29%)              |
| Liver metastasis                           | 13 (62%)             |
| Other site metastasis, not including liver | 2 (9%)               |
| Treatment modality                         |                      |
| Best supportive care only                  | 3 (14%)              |
| Gemcitabine-based                          | 8 (38%)              |
| FOLFIRINOX*                                | 10 (48%)             |
| CA 19-9 (IU/mL), median (range)            | 309.2 (3.11-115,048) |
| CEA (ng/mL), median (range)                | 4.8 (1.09-185.48)    |
| Overall survival (months), median (range)  | 9.7 (0.6-47.8)       |

\* FOLFIRINOX: fluorouracil, leucovorin, irinotecan, oxaliplatin chemotherapy

**Table S2. Sample information.**

| Sample No. | Patient No. | Grade | Type of Sample           | Type of Sample | Location of Sample | Liver Mets (Y, N) | Mets other than Liver | Number of cells | Mean UMI* | Mean genes |
|------------|-------------|-------|--------------------------|----------------|--------------------|-------------------|-----------------------|-----------------|-----------|------------|
| 1          | PB2032      | 2     | Primary PDAC             | Pm0            | Pancreas           | N                 |                       | 1989            | 11273     | 1549       |
| 2          | PB2151      |       | Adjacent Normal Pancreas | Pn             | Pancreas           | Y                 |                       | 2773            | 6230      | 1619       |
| 3          | PB2151      | 2     | Primary PDAC             | Pm1            | Pancreas           | Y                 |                       | 6220            | 7327      | 2025       |
| 4          | PB2155      |       | Adjacent Normal Pancreas | Pn             | Pancreas           | Y                 |                       | 293             | 18887     | 2279       |
| 5          | PB2155      | 3     | Primary PDAC             | Pm1            | Pancreas           | Y                 |                       | 1973            | 12346     | 2298       |
| 6          | PB2155      |       | PDAC Liver Mets          | Lm             | Liver              | Y                 |                       | 460             | 31211     | 4327       |
| 7          | PB2191      |       | Adjacent Normal Pancreas | Pn             | Pancreas           | Y                 |                       | 2567            | 6634      | 1990       |
| 8          | PB2191      | 2     | Primary PDAC             | Pm1            | Pancreas           | Y                 |                       | 1979            | 14131     | 2858       |
| 9          | PB2191      |       | PDAC Liver Mets          | Lm             | Liver              | Y                 |                       | 373             | 40770     | 4774       |
| 10         | PB2203      |       | Adjacent Normal Pancreas | Pn             | Pancreas           | Y                 |                       | 372             | 5652      | 1478       |
| 11         | PB2203      | 2     | Primary PDAC             | Pm1            | Pancreas           | Y                 |                       | 651             | 9025      | 2244       |
| 12         | PB2218      | 2     | Primary PDAC             | Pm1            | Pancreas           | N                 | Y (Bone)              | 688             | 15542     | 2557       |
| 13         | PB2219      | 2     | Primary PDAC             | Pm1            | Pancreas           | Y                 |                       | 1772            | 10224     | 2521       |
| 14         | PB2256      | 2     | Primary PDAC             | Pm0            | Pancreas           | N                 |                       | 2423            | 14512     | 2932       |
| 15         | PB2264      | 2     | Primary PDAC             | Pm1            | Pancreas           | Y                 |                       | 1121            | 23032     | 3432       |
| 16         | PB2264      |       | PDAC Liver Mets          | Lm             | Liver              | Y                 |                       | 3066            | 24041     | 4510       |
| 17         | PB2265      | 2     | Primary PDAC             | Pm1            | Pancreas           | Y                 |                       | 1627            | 26826     | 4867       |
| 18         | PB2266      | 2     | Primary PDAC             | Pm0            | Pancreas           | N                 |                       | 2244            | 11164     | 1969       |
| 19         | PB2268      | 2     | Primary PDAC             | Pm0            | Pancreas           | N                 |                       | 1702            | 14058     | 2798       |
| 20         | PB2281      | 2     | Primary PDAC             | Pm1            | Pancreas           | Y                 |                       | 2833            | 8126      | 2056       |
| 21         | PB2286      | 2     | Primary PDAC             | Pm1            | Pancreas           | Y                 |                       | 2344            | 15857     | 3049       |
| 22         | PB2287      |       | Adjacent Normal Pancreas | Pn             | Pancreas           | N                 |                       | 644             | 12930     | 1951       |
| 23         | PB2287      | 3     | Primary PDAC             | Pm0            | Pancreas           | N                 |                       | 2451            | 13063     | 2772       |
| 24         | PB2311      | 2     | Primary PDAC             | Pm1            | Pancreas           | Y                 |                       | 253             | 64445     | 6186       |
| 25         | PB2311      |       | PDAC Liver Mets          | Lm             | Liver              | Y                 |                       | 2596            | 17732     | 3357       |
| 26         | PB2341      | 3     | Primary PDAC             | Pm1            | Pancreas           | N                 | Y (M1 LN)             | 3895            | 12391     | 2198       |
| 27         | PB2349      | 3     | Primary PDAC             | Pm1            | Pancreas           | Y                 |                       | 2713            | 9596      | 2424       |
| 28         | PB2349      |       | PDAC Liver Mets          | Lm             | Liver              | Y                 |                       | 1973            | 20460     | 4244       |
| 29         | PB2366      | 2     | Primary PDAC             | Pm0            | Pancreas           | N                 |                       | 2857            | 16426     | 3313       |
| 30         | PB2409      | 2     | Primary PDAC             | Pm1            | Pancreas           | Y                 | Y (Lung, Pleura)      | 1953            | 11229     | 2465       |
| 31         | PB2409      |       | PDAC Liver Mets          | Lm             | Liver              | Y                 |                       | 5380            | 11059     | 2418       |
| 32         | PB2410      | 2     | Primary PDAC             | Pm1            | Pancreas           | Y                 |                       | 2460            | 10657     | 1800       |
| 33         | PB2410      |       | PDAC Liver Mets          | Lm             | Liver              | Y                 |                       | 2559            | 21248     | 3245       |

\* UMI: unique molecular identifier

**Table S3. Signature genes of the four NMF subtypes.**

| <b>NMF-1</b> | <b>NMF-2</b> | <b>NMF-3</b> | <b>NMF-4</b> |
|--------------|--------------|--------------|--------------|
| MKI67        | FTL          | CLU          | CTSD         |
| TOP2A        | KRT19        | SERPING1     | PMEP1        |
| TPX2         | KRT18        | SLC4A4       | TACSTD2      |
| HMGB2        | TM4SF1       | CYB5A        | KRT17        |
| CENPF        | CSTB         | FXD2         | PHLDA3       |
| NUSAP1       | TIMP1        | CFTR         | SLPI         |
| CDK1         | TSPAN8       | SNRPN        | FXD5         |
| PRC1         | AGR2         | CLDN10       | CCND1        |
| BIRC5        | CD55         | SPP1         | IER5         |
| MAD2L1       | S100A14      | SERPINA6     | S100A2       |
| UBE2C        | TPM1         | GC           | SOX4         |
| SMC4         | KRT7         | CXCL2        | CTSH         |
| ASPM         | SPINK1       | SERPINA5     | SNCG         |
| KIAA0101     | S100P        | PIGR         | S100A9       |
| H2AFZ        | ERO1A        | AMBP         | GJB2         |
| KIF20B       | LGALS4       | EGR1         | GLTP         |
| ZWINT        | CLTB         | GATM         | AIG1         |
| CEP55        | LYZ          | CES1         | CRABP2       |
| KIF23        | ANXA1        | RPS10        | PVRL1        |
| UBE2T        | IER3         | METTL7A      | CDKN2A       |
| CDKN3        | LAMB3        | CD74         | PTGS2        |
| CCNB1        | HSPA1A       | ZFP36        | NME4         |
| TK1          | CTSE         | UGT2B15      | GLUL         |
| ANLN         | ASPH         | FCGBP        | ARHGDI8      |
| CCNB2        | S100A16      | SLC3A1       | SLC9A3R2     |
| KIF11        | CEACAM6      | LGALS2       | IGF2         |
| HMMR         | MIF          | ID2          | FBLN1        |
| LMNB1        | MRPS21       | STXBP6       | FAM83A       |
| PTTG1        | PDZK1IP1     | HOMER2       | MGST1        |
| NDC80        | SERPINB1     | KIF12        | GATA3        |
| CENPE        | FAM3C        | FGGY         | KRT13        |
| CCNA2        | KRTCAP2      | NFKBIA       | SCPEP1       |
| RRM2         | IL32         | RBP1         | LYPD3        |
| GTSE1        | S100A4       | CTGF         | TFPT         |
| CENPW        | KLF2         | ASRGL1       | FSCN1        |
| NUF2         | ANXA3        | HHEX         | LY6D         |
| SPC25        | PLA2G16      | NDRG2        | PLAT         |
| DLGAP5       | KLK11        | BTG2         | SULF2        |
| CDC20        | GCNT3        | RHOB         | PLAU         |
| SGOL2        | KLF4         | UGT2A3       | METRN        |
| RAD51AP1     | PLAC8        | TCEA3        | GALNT1       |
| SGOL1        | HMGA1        | MUC5B        | PHLDA1       |
| TYMS         | VEGFA        | SCGB3A1      | BCAM         |
| NCAPG        | TESC         | CITED4       | ITM2C        |
| ARHGAP11A    | CLDN18       | NR4A1        | TYMP         |
| TACC3        | ISG20        | ERICH5       | PTGES        |
| KIFC1        | APOL1        | NR2F2        | IRX3         |
| STMN1        | HSPA1B       | CLDN3        | KRT5         |
| AURKB        | TFF2         | CA2          | TMEM40       |
| CDCA3        | TRNP1        | SERPINA1     | BAG3         |
| CDCA8        | TFPI         | SERPINA4     | GJB6         |
| CENPK        | AGR3         | C6           | CLEC2B       |
| NEK2         | TIMP2        | ZC3H12A      | SLC2A1       |
| PLK1         | SLC40A1      | GLIS3        | TGM2         |
| KIF2C        | RPL36A       | IRF1         | NAPRT        |
| FOXM1        | RPL22L1      | MAFF         | SEMA3C       |

|           |            |             |           |
|-----------|------------|-------------|-----------|
| CASC5     | AC090498.1 | RP1-60O19.1 | CFH       |
| KIF4A     | SNX9       | DNAJB1      | FLNA      |
| AURKA     | PON2       | SOD2        | LRRC8A    |
| BUB1      | SRD5A3     | FAM3D       | CAPS      |
| DTYMK     | SFTA2      | KCNJ15      | SYNGR1    |
| ATAD2     | RND3       | CRISP3      | GPR153    |
| TUBA1B    | AREG       | HLA-DPB1    | UPK3B     |
| HJURP     | CTSS       | CYS1        | PVRL4     |
| CENPA     | WFDC2      | PDGFD       | AQP3      |
| KIF14     | RAB40B     | BEX5        | LINC01503 |
| CKAP2L    | CTSC       | ALDH1A1     | LAMC2     |
| DEPDC1    | TFF1       | HABP2       | RHOD      |
| PBK       | CCDC68     | CFI         | CDC42EP3  |
| TTK       | CLDN23     | KDM6B       | IGFBP3    |
| CDCA5     | TMEM176B   | AGT         | C16orf74  |
| ECT2      | RNASET2    | KIAA1324    | IGFBP7    |
| CKAP2     | SLC16A3    | C3          | TSC22D3   |
| MELK      | LINC01133  | ZG16B       | ADIRF     |
| PRR11     | KCNQ1OT1   | ARSE        | CETN2     |
| BUB1B     | CYP2S1     | HLA-DRB1    | NMB       |
| CKS1B     | NDRG1      | C12orf75    | GRHL1     |
| DIAPH3    | TNFRSF12A  | MT1F        | TMEM45A   |
| SHCBP1    | BIRC3      | HES1        | CST6      |
| ORC6      | TNFRSF21   | AQP1        | SEMA4B    |
| RACGAP1   | ITGA2      | LCN2        | LAMB1     |
| CKS2      | MACC1      | TM4SF4      | SCCPDH    |
| MYBL2     | GABRP      | EPB41L4A    | CD109     |
| FANCI     | HS3ST1     | COL18A1     | ADAM8     |
| KIAA1524  | SEMA3B     | BEX4        | KRT23     |
| SPAG5     | EMP1       | SORBS2      | AMIGO2    |
| SMC2      | PLAUR      | ONECUT2     | HOMER3    |
| NCAPH     | HMGS1      | PLD1        | B4GALT1   |
| KPNA2     | C6orf48    | SEC11C      | MBOAT2    |
| BRCA1     | RAB27B     | SCTR        | TGFB1     |
| CIT       | ANXA10     | GPX2        | TRIM29    |
| SKA3      | MUC13      | GAMT        | APOBEC3G  |
| ASF1B     | VNN1       | CXCL3       | FAM129B   |
| TROAP     | TM4SF5     | CD81        | PPL       |
| MND1      | TXNRD1     | FBP1        | PRSS22    |
| CDCA2     | TPM2       | CYR61       | DUSP5     |
| CENPN     | MALL       | FHIT        | NCCRP1    |
| NUDT1     | FAM46A     | TFF3        | CHST11    |
| KIF18B    | KLK10      | TACC1       | ARL4D     |
| FAM83D    | VSIG2      | SLC25A25    | MUC4      |
| ARHGAP11B | PNP        | SFRP5       | LTBP2     |
| IQGAP3    | IL2RG      | CHST9       | SERPINB5  |
| KIF15     | GSTM3      | ACE2        | CLIC3     |
| KIF18A    | MMP7       | DEFB1       | ISG15     |
| ANP32E    | TMEM176A   | ONECUT1     | LRMP      |
| KNSTRN    | LMO4       | RASD1       | SNAI2     |
| UBE2S     | PRSS8      | SLC12A2     | SYT8      |
| NCAPD2    | SMIM6      | CNN3        | ITGB6     |
| KIF20A    | BMP2       | PPP1R1B     | ZNF750    |
| NCAPD3    | ALDH2      | CXCL1       | MAP3K8    |
| BRCA2     | RAMP1      | GGT1        | SSPN      |
| HELLS     | AKR7A3     | FGFR3       | COL6A1    |
| HMGB3     | C4orf48    | HLA-DQB1    | MMP14     |
| RRM1      | AHNAK2     | TNFSF13B    | MXRA8     |
| PHF19     | CMBL       | SELENBP1    | LPCAT2    |
| SAPCD2    | TUBA4A     | ID4         | MT2A      |

|          |                |              |             |
|----------|----------------|--------------|-------------|
| PKMYT1   | FAM101A        | SOD3         | QPRT        |
| DSCC1    | SLC3A2         | CLDN2        | DSE         |
| HIST1H1B | ABHD11-AS1     | APCDD1       | MDM2        |
| CENPU    | IDI1           | AKR1C3       | MUC16       |
| RNASEH2A | P4HA1          | ANPEP        | DUSP23      |
| ESCO2    | FDFT1          | TCN1         | LSP1        |
| CLSPN    | RP11-1143G9.4  | SNHG18       | NUAK1       |
| FEN1     | ONECUT3        | GADD45B      | KRT15       |
| POLQ     | EPS8L1         | FAM150B      | KRT4        |
| DHFR     | BST2           | MUC6         | S100A8      |
| CCDC34   | SLC25A37       | MT1E         | CSTA        |
| DNMT1    | PITX1          | KCNJ16       | PCDH7       |
| CENPM    | XRCC4          | GYPC         | IGFBP4      |
| PCNA     | C10orf10       | CTNND2       | HMGA2       |
| DUT      | RP11-350J20.12 | VTN          | GPC1        |
| H2AFX    | EGLN3          | SLC38A11     | MDFI        |
| CCNF     | SYT13          | NPDC1        | SRGAP3      |
| ATAD5    | EFNA1          | FOLR1        | VIM         |
| MCM4     | HSBP1L1        | BCO2         | GPR87       |
| E2F8     | CDHR2          | DMBT1        | MMP2        |
| TUBB     | EIF4E          | NR5A2        | CTHRC1      |
| POC1A    | C15orf48       | PAH          | PGM2L1      |
| HIST1H4C | APOA1BP        | SLC28A3      | CMTM3       |
| PSRC1    | AP1S1          | F5           | SGK1        |
| CDC6     | IRF7           | GAS6         | DCBLD2      |
| FAM111B  | VIL1           | PIK3AP1      | RHOV        |
| GPSM2    | MLF1           | NUAK2        | EPHA4       |
| MZT1     | SLC6A8         | ALDH1A2      | OAS1        |
| CHEK1    | PLA2G10        | TRPV6        | LINC00152   |
| RFC3     | CHPT1          | HLA-DRB5     | KRT6A       |
| GGH      | ITGB8          | NOSTRIN      | PALLD       |
| PIF1     | LAMA3          | LINC00261    | LGALS1      |
| MCM3     | HIST1H1C       | NR2F1        | PDLIM7      |
| DBF4     | PRR15L         | RP11-528G1.2 | LCP1        |
| STRA13   | ADGRF1         | WDR72        | RP11-54H7.4 |
| CENPH    | PTPRR          | PROX1        | F3          |
| CDC45    | MSLN           | IFI6         | TGFBI       |
| UHRF1    | CKB            | FAM3B        | MTSS1       |
| RAD51    | RP11-462G2.1   | FLRT2        | COL1A1      |
| RECQL4   | MUC3A          | GP2          | FN1         |
| TUBA1C   | HLA-DRA        | MATN2        | CLDN1       |
| HIST1H1D | ODC1           | DCDC2        | FAM84A      |
| GIN52    | SPNS2          | BEX1         | TNS4        |
| FAM111A  | CRIP1          | FILIP1L      | RHOBTB3     |
| TCF19    | TNNT1          | MAN1A1       | PYGL        |
| CDT1     | C9orf3         | HLA-DMA      | BCL11A      |
| FAM64A   | ANG            | WNK2         | TTC9        |
| MCM10    | ARL14          | ACSM3        | PFN2        |
| FBXO5    | SULT1C2        | PDE5A        | LRIF1       |
| RPL39L   | TNFSF10        | SLC17A4      | CXCL17      |
| RFC4     | APOL2          | HLA-DPA1     | PODXL       |
| MXD3     | EIF4EBP1       | VWA1         | SUSD4       |
| C21orf58 | SF3B4          | SLC5A1       | CTSL        |
| BORA     | HSD17B2        | EDN1         | PLOD1       |
| MCM7     | RDH10          | RARRES2      | MT1X        |
| XRCC2    | DDIT4          | LYPD6B       | ALDH1L1     |
| LIG1     | TMEM173        | ZNF667-AS1   | FRMD6       |
| ATP1B3   | CDC42EP5       | AKAP7        | SLC39A2     |
| BRI3BP   | HK2            | NEB          | NRP2        |
| MNS1     | MXD1           | MPP1         | SRGN        |

|           |               |              |          |
|-----------|---------------|--------------|----------|
| DTL       | RPL17         | ANXA13       | KRT16    |
| CBX5      | RP11-841O20.2 | BAAT         | ANXA8    |
| CDC25B    | MMP1          | CYB5D1       | LAMA4    |
| E2F1      | ERRF11        | RIC3         | SERPINE1 |
| CHAF1A    | GPSM3         | TTR          | TRIM16   |
| NMU       | RNASE1        | TUSC3        | IFITM10  |
| WDR76     | AOC1          | NEURL3       | MSN      |
| MCM2      | NCEH1         | PDLIM3       | ELF5     |
| MCM6      | PRSS21        | CFB          | SLC1A3   |
| CDCA7     | SLCO4A1       | CDH6         | SLITRK6  |
| FABP5     | MSMO1         | HSPB8        | TMEM132A |
| ARHGEF39  | CEACAM5       | CRIP2        | LAPTM5   |
| GMNN      | DDIT3         | DACH1        | HCAR2    |
| PTMS      | DKK1          | PTGR1        | HES4     |
| FDPS      | CES2          | PKHD1        | EPHB2    |
| HIST1H1E  | ARHGAP29      | SCGB2A1      | COL7A1   |
| MCM5      | TRIM54        | NTRK2        | TP63     |
| TMEM97    | RARRES3       | ADORA1       | DSG3     |
| HIST2H2AC | RHOF          | SCD5         | G0S2     |
| LDHB      | CA9           | DPM3         | CDH3     |
| TNFAIP8L1 | PPP1R14D      | RP11-469H8.6 | PLTP     |
| CDKN2C    | UPP1          | PRKACB       | GPNMB    |
| SLC43A3   | SAMD9         | HGD          | CRLF1    |
| CCDC88A   | CA12          | COLCA1       | OVOL1    |

---

# Supplementary Figures

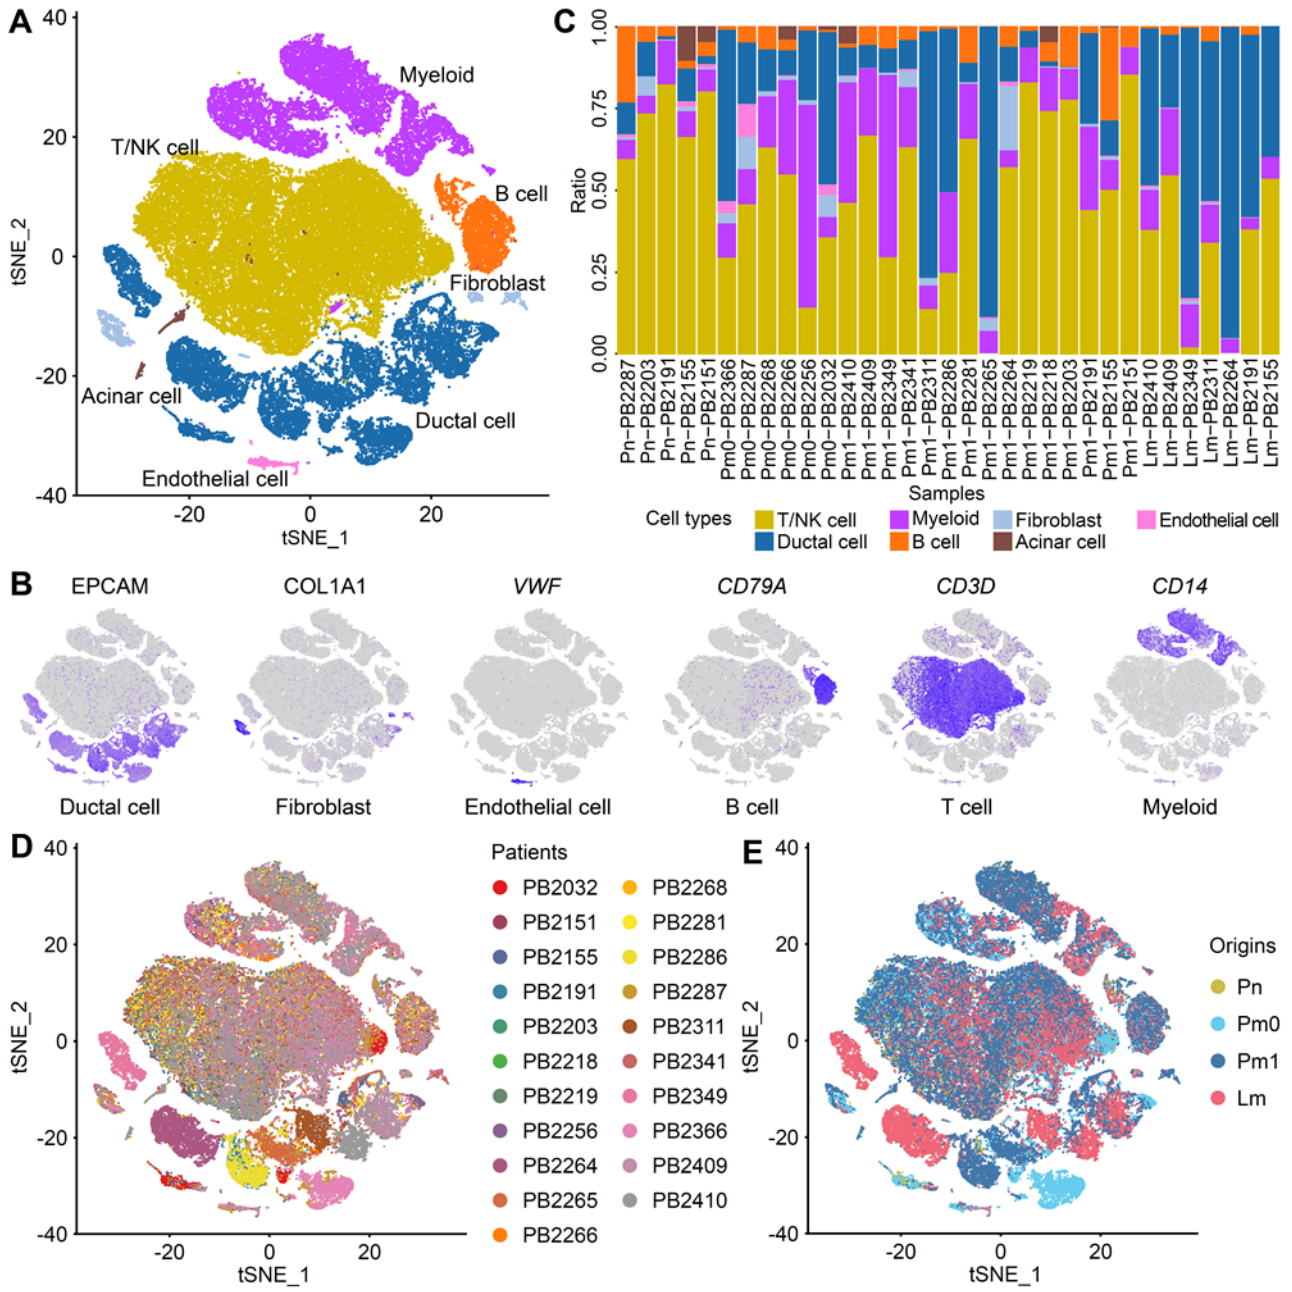

**Fig. S1** Overview of single cells from the primary PDAC mass and matched liver metastasis. **A**, t-SNE projection of 69,204 single cells showing the formation of 21 clusters, including ductal cells, T cells, myeloid cells, fibroblasts, B cells, acinar cells, and endothelial cells. **B**, t-SNE projections displaying the expression of known cell type marker genes. **C**, Bar plot showing the proportion of major cell types in each sample from each patient. **D** and **E**, t-SNE projections of scRNA-seq data isolated from individual PDAC patients. Each dot represents one cell and the colors represent the patients (**D**) and the origins (**E**).

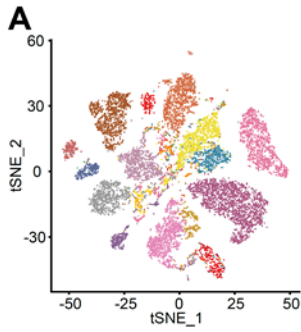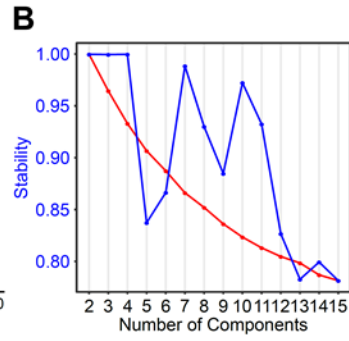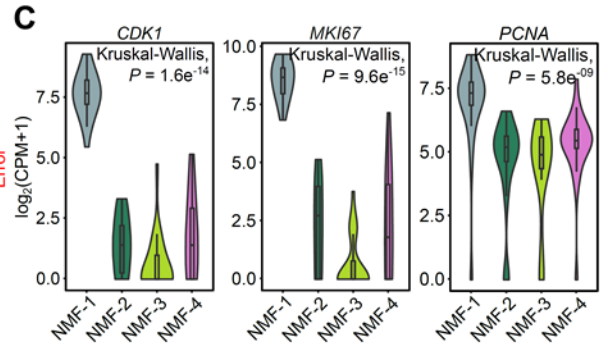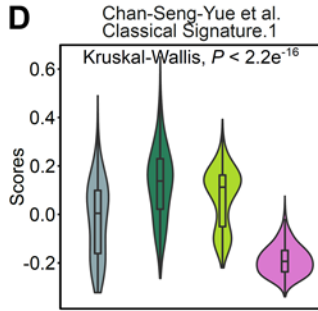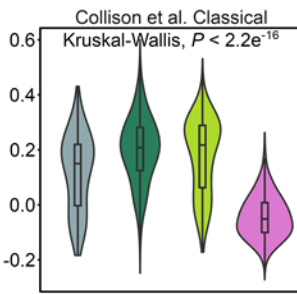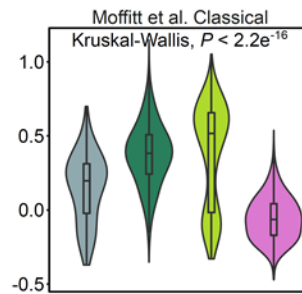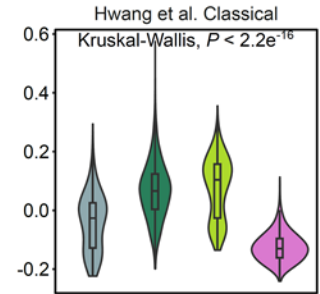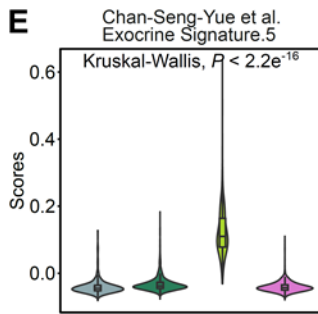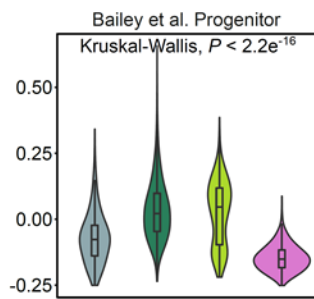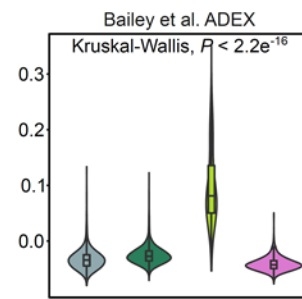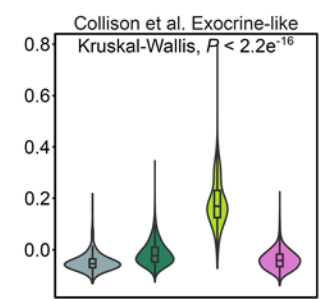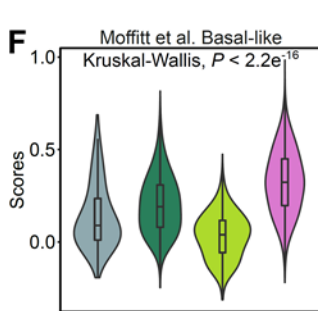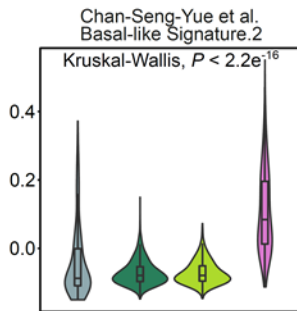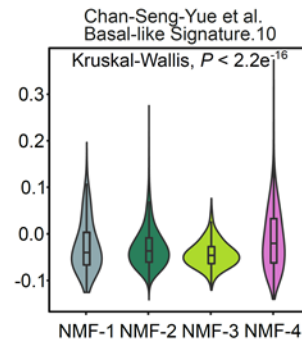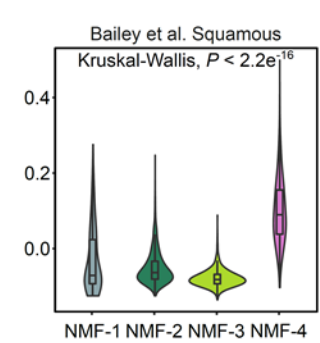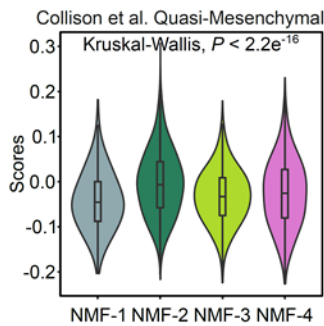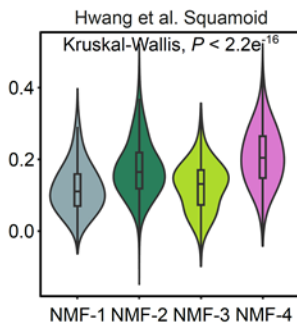

**Fig. S2** Molecular subtypes of ductal cells in the primary PDAC mass and matched liver metastasis. **A**, t-SNE projection showing 21 sub-clusters of ductal cells. Each dot is color-coded by the patients. **B**, Stability and error of cNMF solutions for ductal cells with different numbers of programs. **C**, Violin plots showing the expression level of cell cycle related genes for each NMF subtype. **D-F**, Violin plots displaying the scores of signature genes from previously reported classical (**D**), exocrine (**E**), and basal-like (**F**) subtypes.

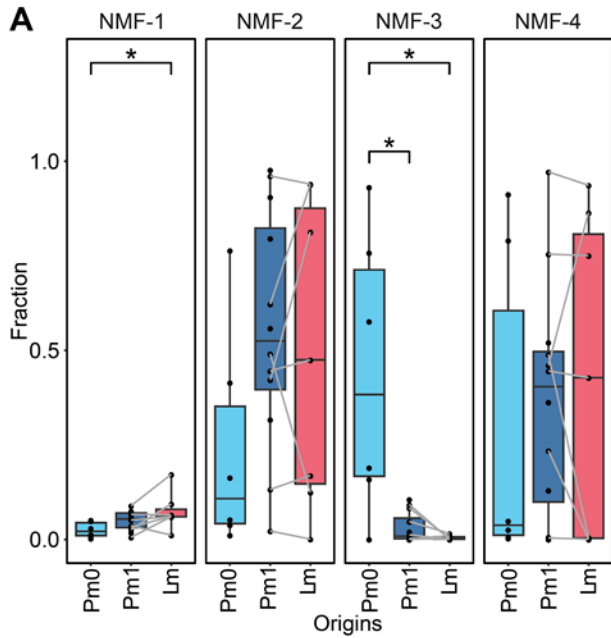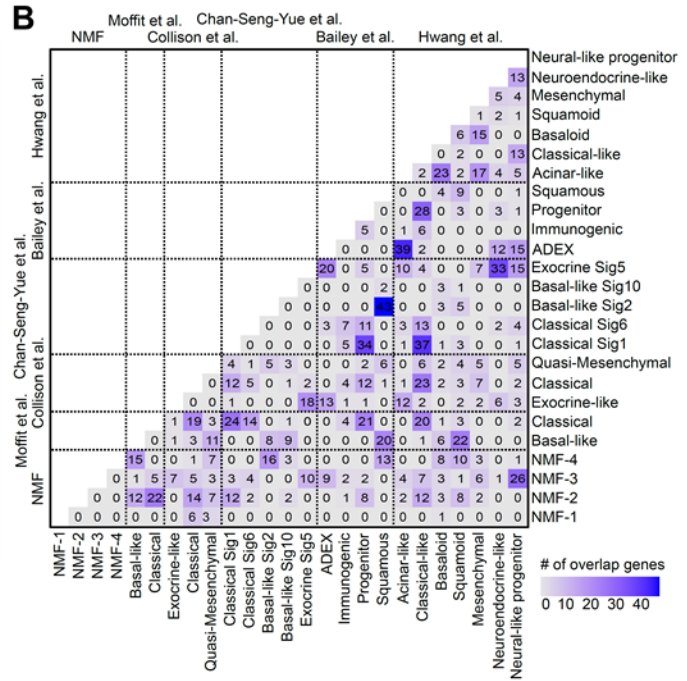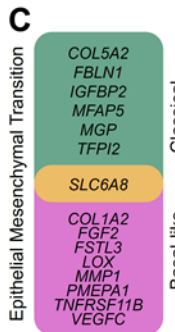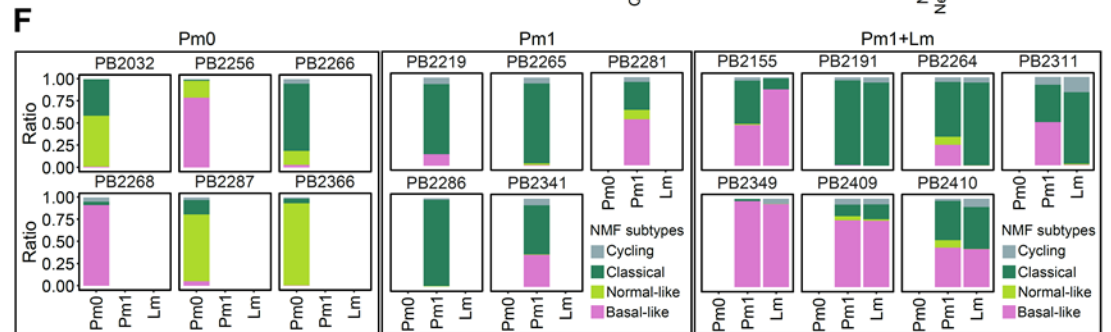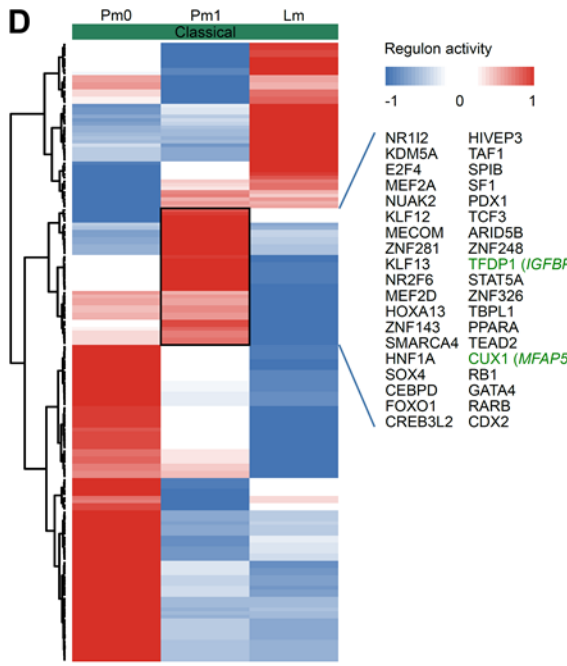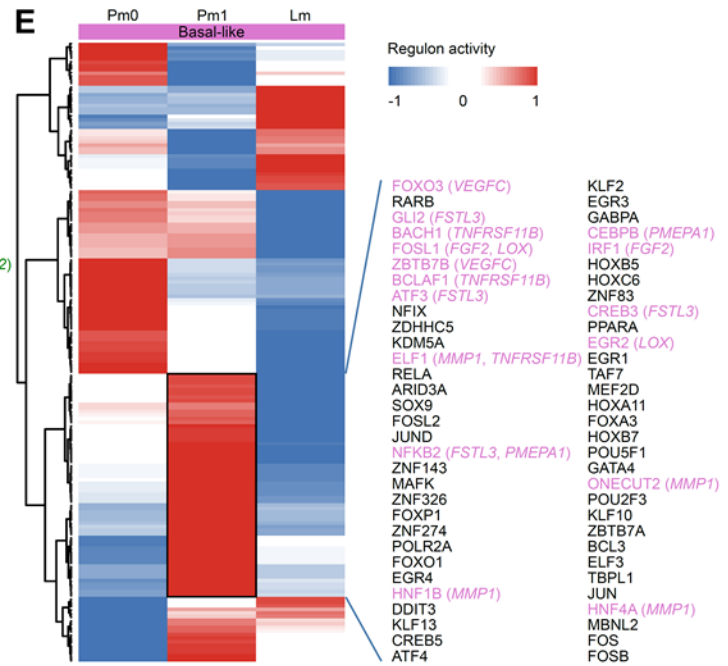

**Fig. S3** Relationship between PDAC subtype and patient prognosis. **A**, Box plots showing the percentage differences in NMF subtypes among origins (two-sided Wilcoxon rank sum test:  $*P < 0.05$ ,  $**P < 0.01$ ,  $***P < 0.001$ ). Samples from the same patients were connected by solid lines. **B**, Heatmap showing the shared signature genes between NMF subtypes and previously reported subtype signature genes. **C**, Venn diagram illustrating the similarity of EMT genes related to classical or basal-like subtype. **D** and **E**, Heatmaps showing Pm1-specifically activated TFs in classical and basal-like PDAC subtypes. TFs regulating the PDAC subtype specific EMT genes in Pm1 are colored to match the subtypes. **F**, Bar plots showing the fraction of four NMF subtypes in each sample, and each color indicated the subtype.

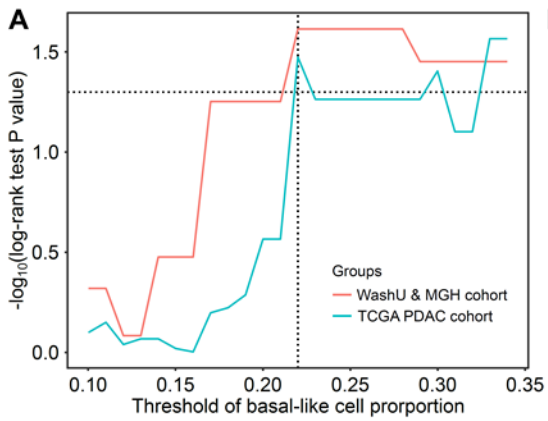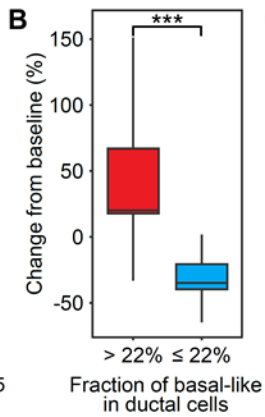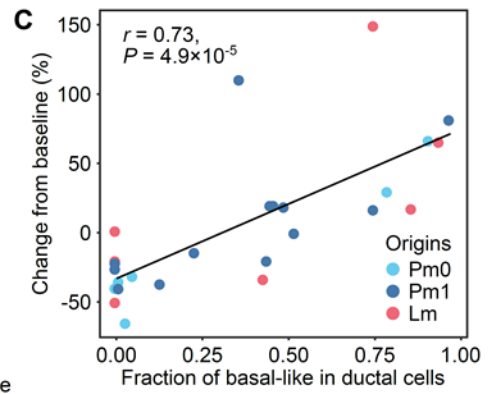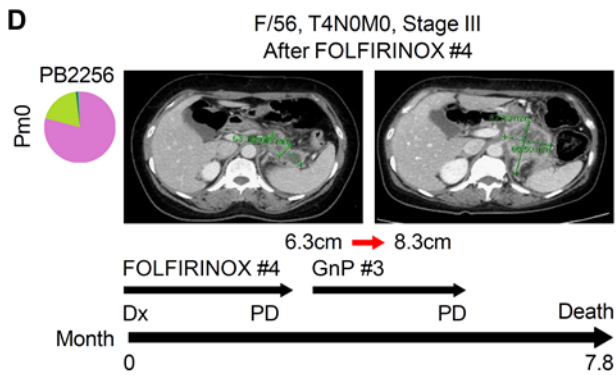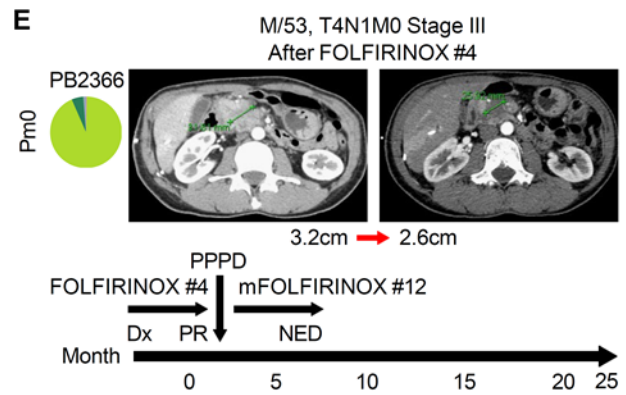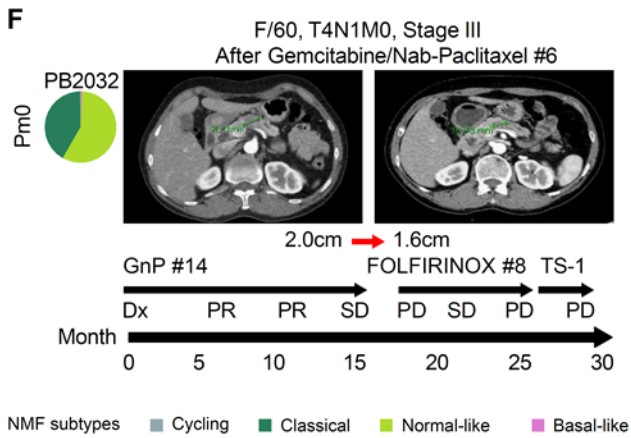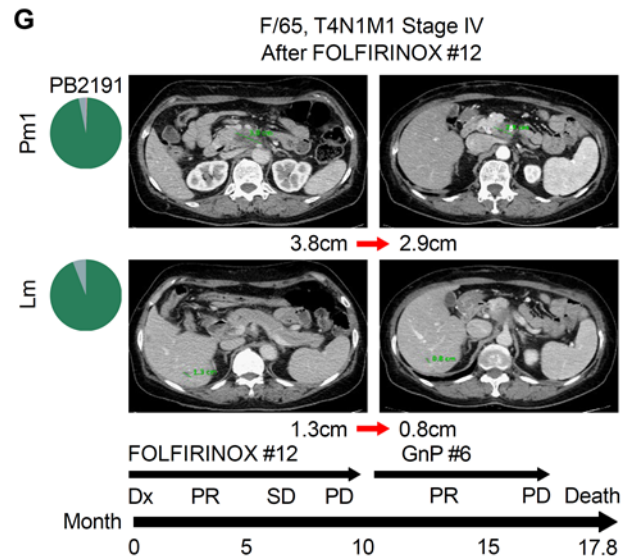

**Fig. S4** An investigation of treatment courses for patients with different NMF subtypes. **A**, Line plot showing Kaplan-Meier (log-rank) test  $P$  values (horizontal dotted line for  $P=0.05$ ) when dividing samples of the TCGA PDAC cohort (bulk RNA-seq,  $N=148$ ) and WashU and MGH cohorts (scRNA-seq,  $N=25$ ) into two groups based on a range of basal-like cell proportions (10~35%). The minimum basal-like cell proportion exhibiting a statistical association with survival in both cohorts is 22% (vertical dotted line). **B**, Boxplot showing the distribution of change in the sum of the target lesions (RECIST v1.1) within two groups (two-sided Wilcoxon rank sum test:  $*P < 0.05$ ,  $**P < 0.01$ ,  $***P < 0.001$ ). **C**, Scatter plot displaying the Pearson correlation between change in the sum of the target lesions (RECIST v1.1) and the fraction of basal-like in ductal cells. **D-G**, The proportion of PDAC NMF subtypes and CT scan images before and after chemotherapy of PDAC patients PB2256 (**D**), PB2366 (**E**), PB2032 (**F**), and PB2191 (**G**).

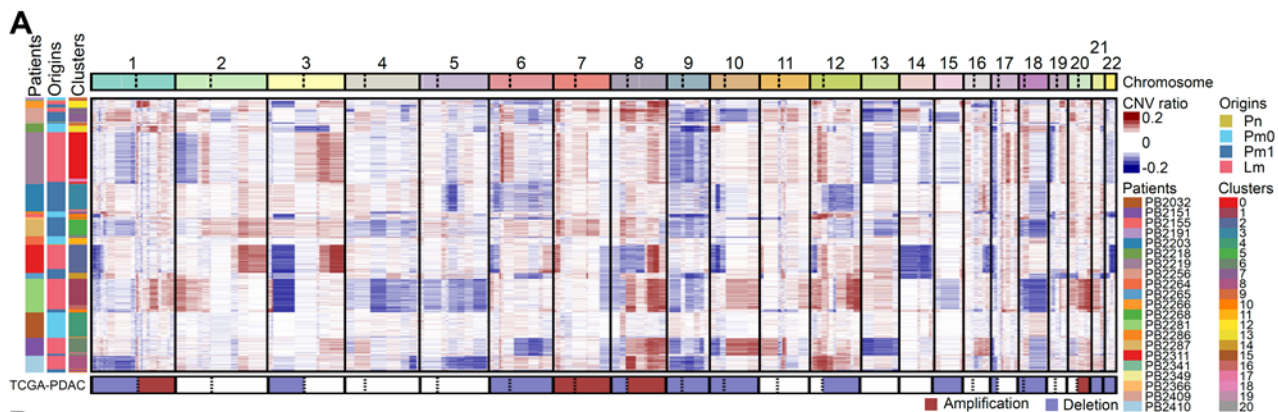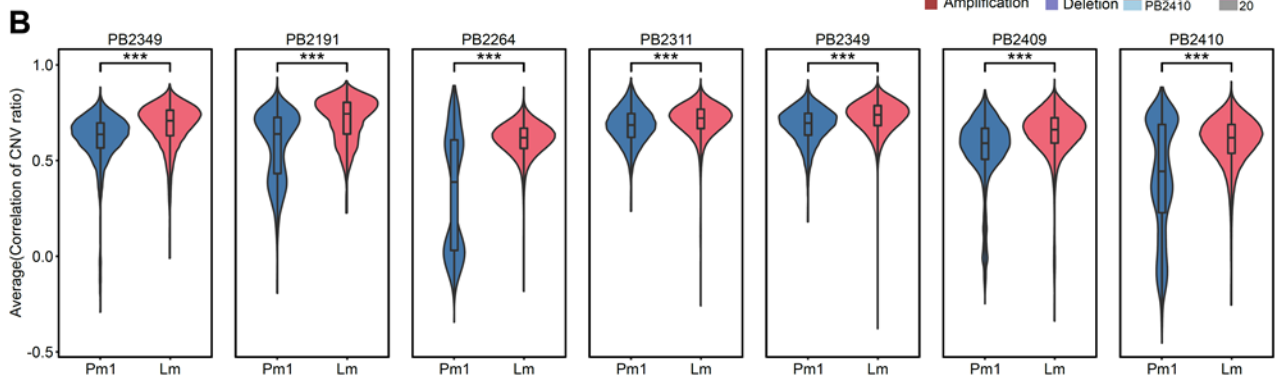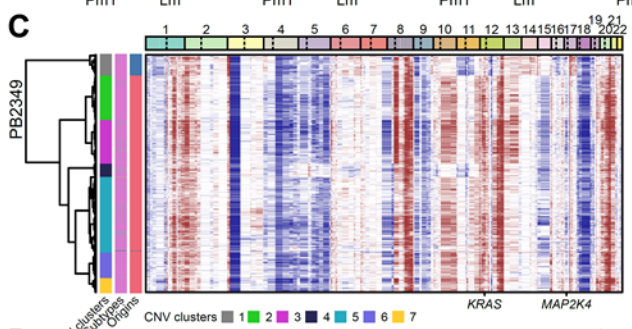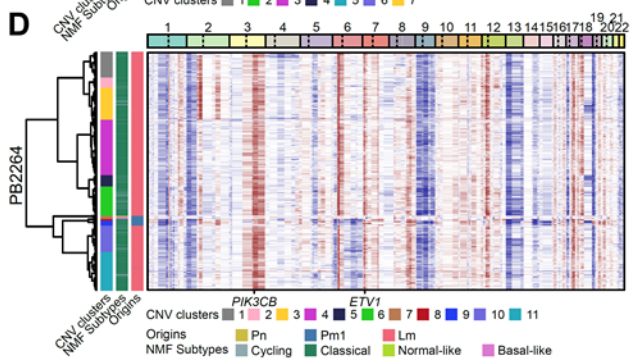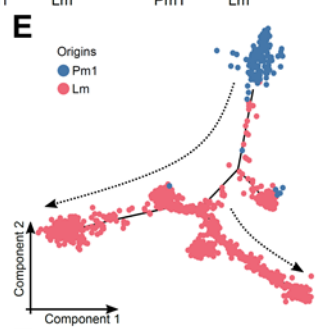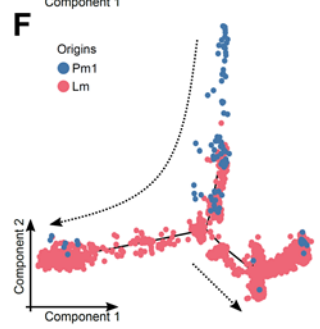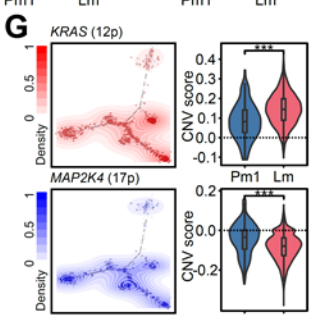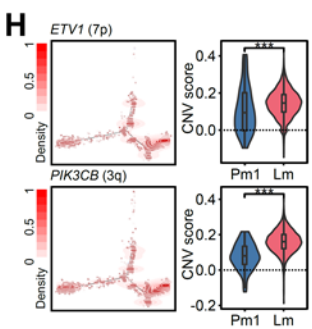

**Fig. S5** Clonal evolution of ductal cells in PDAC progression and metastasis. **A**, Heatmap showing CNVs profiles of ductal cells from primary PDAC masses and matched liver metastases. Each cell is sorted by patient and sample (left sidebar). The bottom sidebar shows the CNV profiles at the genomic level of TCGA PDAC patients. **B**, Violin plots showing the distribution of mean CNV correlation coefficients among malignant ductal cells within origin by patient (two-sided Wilcoxon rank sum test:  $*P < 0.05$ ,  $**P < 0.01$ ,  $***P < 0.001$ ). **C** and **D**, Hierarchical clustering of CNV profiles in individual patients PB2349 (**C**) and PB2264 (**D**). **E** and **F**, Unsupervised transcriptional trajectories of ductal cells in individual patients PB2349 (**E**) and PB2264 (**F**) colored by sample origin. Trajectory directions were indicated by arrows. **G** and **H**, Dots on trajectory projections (left) were colored by copy number scores at the cellular level and overlaid with contour plots of cells with the strongest copy number variation for known cancer-associated genes in individual patients PB2349 (**G**) and PB2264 (**H**). Violin plots (right) showed copy number scores of genes by origin (two-sided Wilcoxon rank sum test:  $*P < 0.05$ ,  $**P < 0.01$ ,  $***P < 0.001$ ).

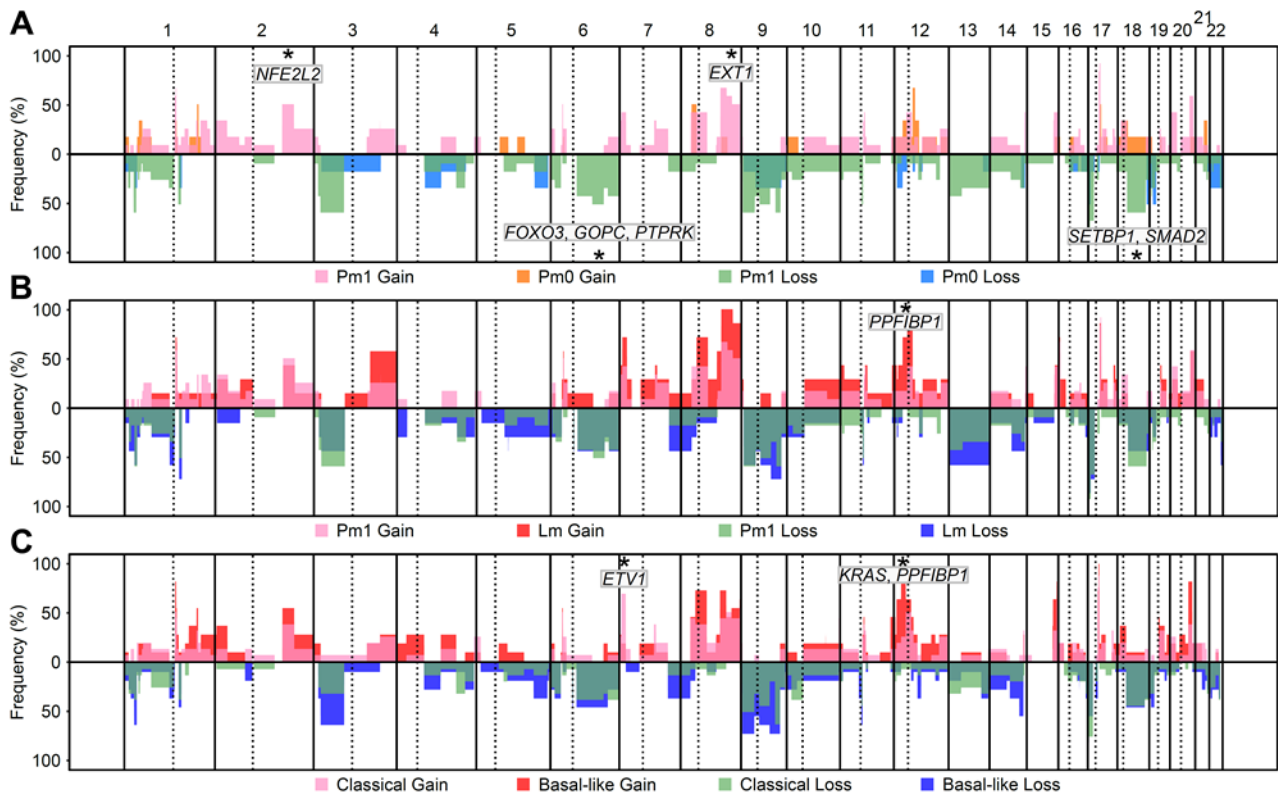

**Fig. S6** Clonal evolution during PDAC progression. **A-C**, Histograms showing the frequency of CNV gains (pink and red) or losses (green and blue) according to origins (**A**, Pm0 versus Pm1; **B**, Pm1 versus Lm) or PDAC subtypes (**C**, classical versus basal-like). Asterisks indicated regions showing significant differences through Fisher's exact test ( $P < 0.05$ ).

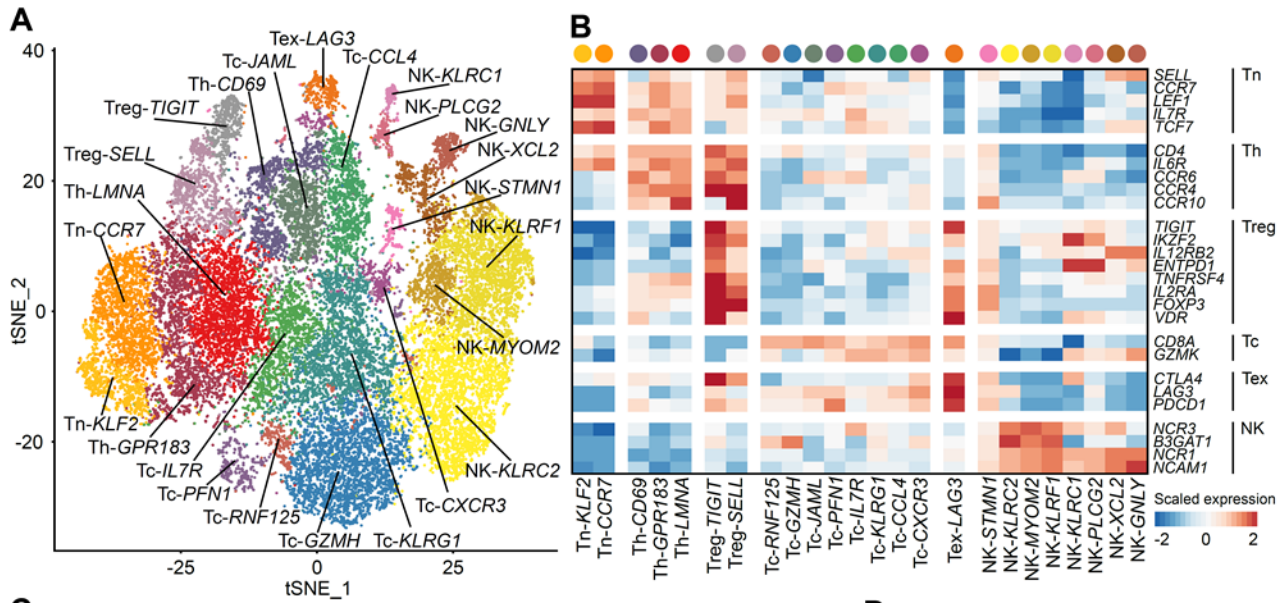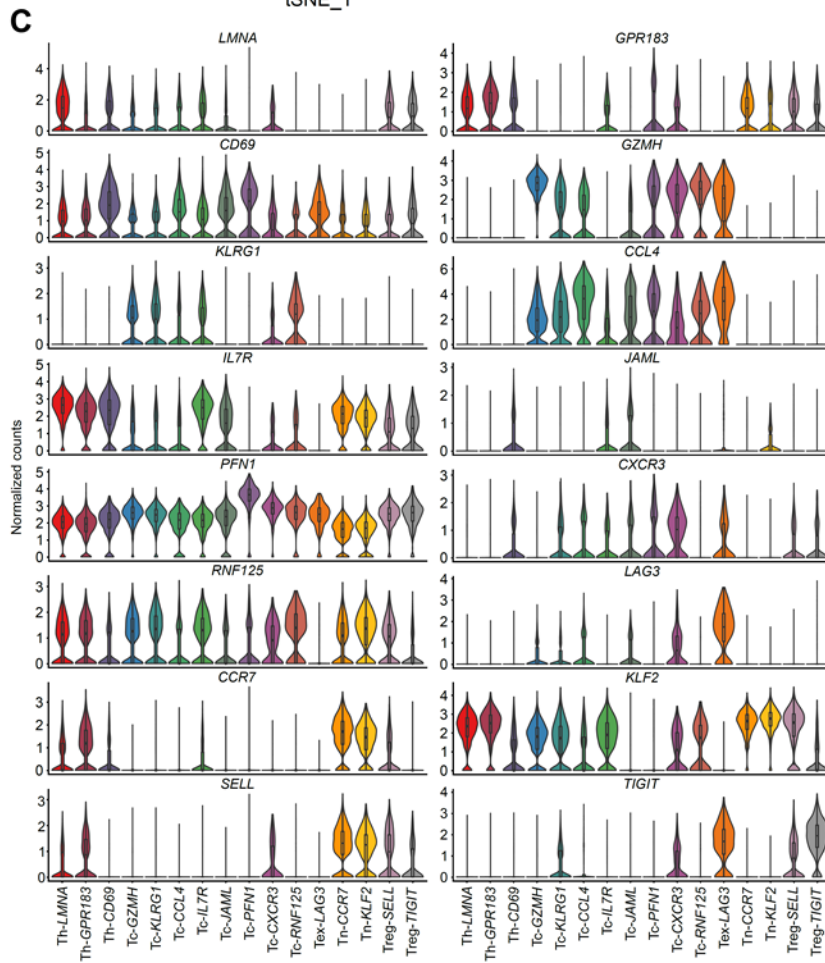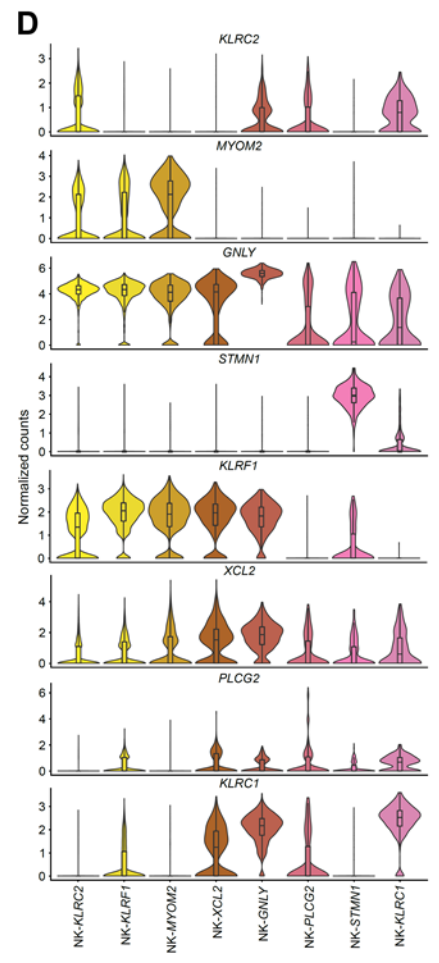

**Fig. S7** T/NK cells subclusters in the primary PDAC mass and matched liver metastasis. **A**, t-SNE projection showing 24 subclusters of T/NK cells. Each dot is color-coded by cluster. **B**, Heatmap showing the expression level of cell type marker genes in each T/NK cell subcluster. **C** and **D**, Expression level of cell type markers for T (**C**) and NK (**D**) cell subclusters.

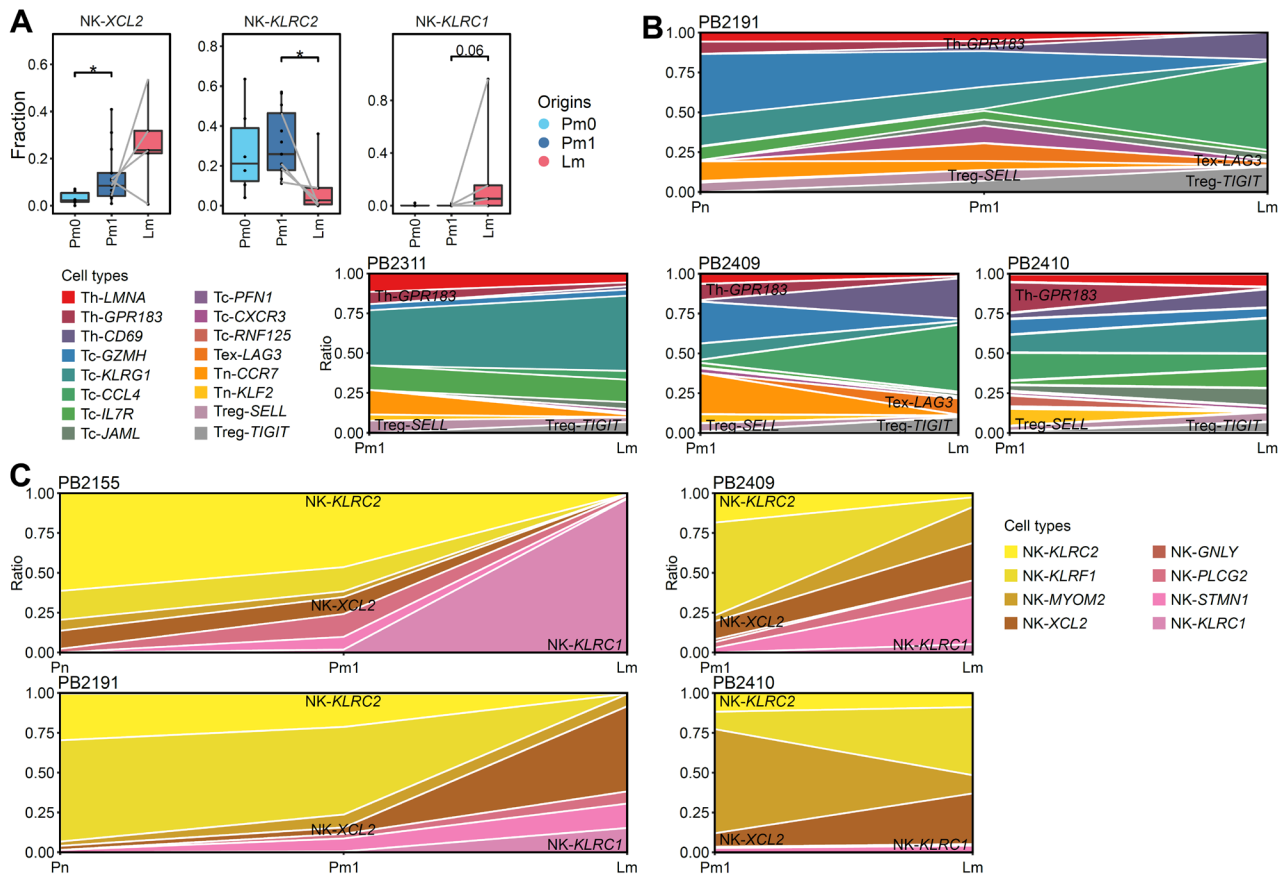

**Fig. S8** Variations in the composition of T/NK subclusters according to patient origin. **A**, Box plots indicating the percentage differences in T/NK cell subclusters among origins (two-sided Wilcoxon rank sum test: \* $P < 0.05$ , \*\* $P < 0.01$ , \*\*\* $P < 0.001$ ). Samples from the same patients were connected by solid lines. **B** and **C**, Area plots displaying the changes in T cell (**B**) and NK (**C**) subcluster composition by origin for each patient.

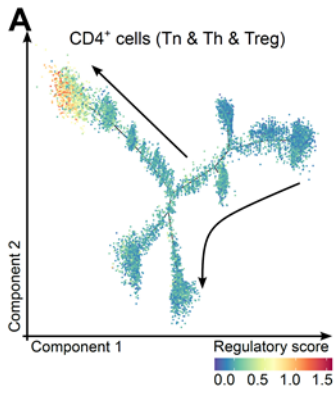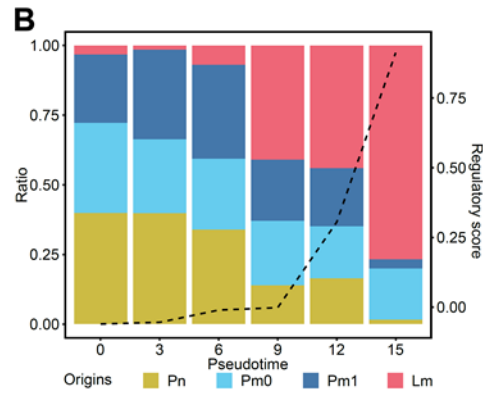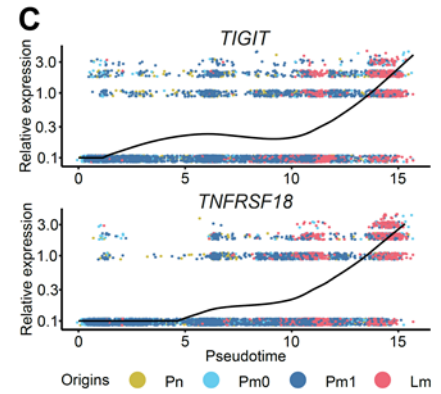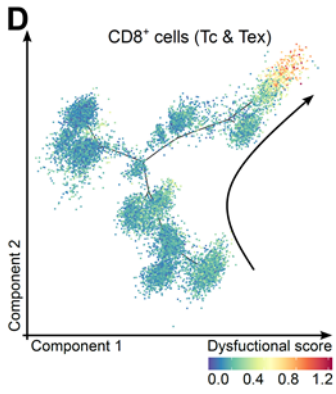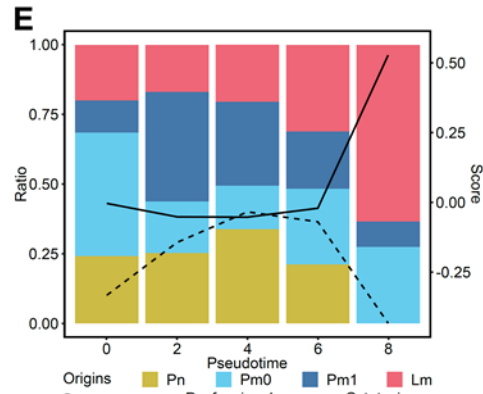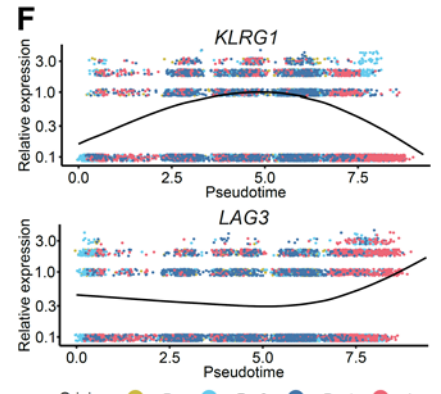

**Fig. S9** Lineage analysis of T cells in PDAC progression and metastasis. **A**, Unsupervised transcriptional trajectory of CD4<sup>+</sup> T cells (Tn, Th and Treg) in primary PDAC and liver metastasis. The color of each dot represents a regulatory score. Trajectory directions were indicated by arrows. **B**, Bar plot showing the ratio of origins at each pseudotime interval, and each color represents an origin. The dotted line indicates the average regulatory score for each pseudotime interval. **C**, Relative expression of representative regulatory genes, *TIGIT* and *TNFRSF18*, along pseudotime, and each dot is colored by origins. **D**, Unsupervised transcriptional trajectory of CD8<sup>+</sup> T cells (Tc and Tex) in primary PDAC and liver metastasis. The color of each dot represents a dysfunctional score. Trajectory directions were indicated by arrows. **E**, Bar plot showing the ratio of origins at each pseudotime interval, and each color represents an origin. Mean dysfunctional and cytotoxic scores for pseudotime intervals were illustrated by solid and dotted lines, respectively. **F**, Relative expression of representative cytotoxic (*KLRG1*) and dysfunctional (*LAG3*) genes along pseudotime, and each dot is colored by origins.

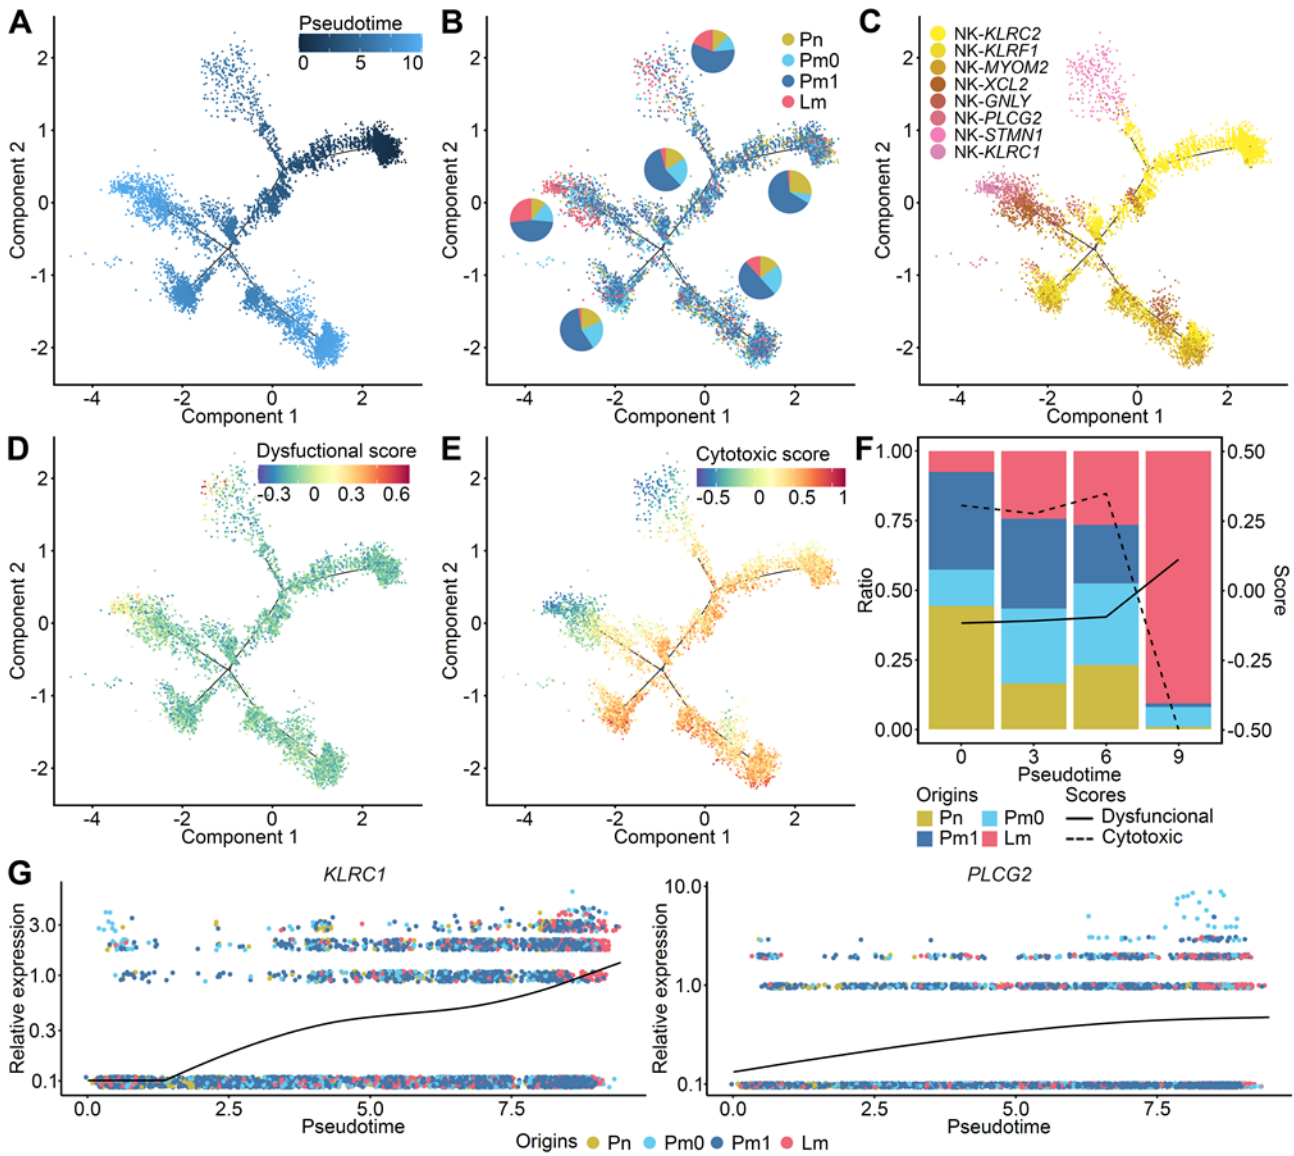

**Fig. S10** Lineage analysis of NK cells in PDAC progression and metastasis. **A-E**, Unsupervised transcriptional trajectory of NK cell in primary PDAC mass and liver metastasis biopsy. The color of each dot is indicated by pseudotime (**A**), origins (**B**), NK cell subtypes (**C**), dysfunctional score (**D**), and cytotoxicity score (**E**). **F**, Bar plot showing the ratio of origins at each pseudotime interval, and each color represents an origin. Mean dysfunctional and cytotoxic scores for pseudotime intervals were illustrated by solid and dotted lines, respectively. **G**, Relative expression of representative dysfunctional (*KLRC1* and *PLCG2*) genes across pseudotime, and each dot is colored by origins.

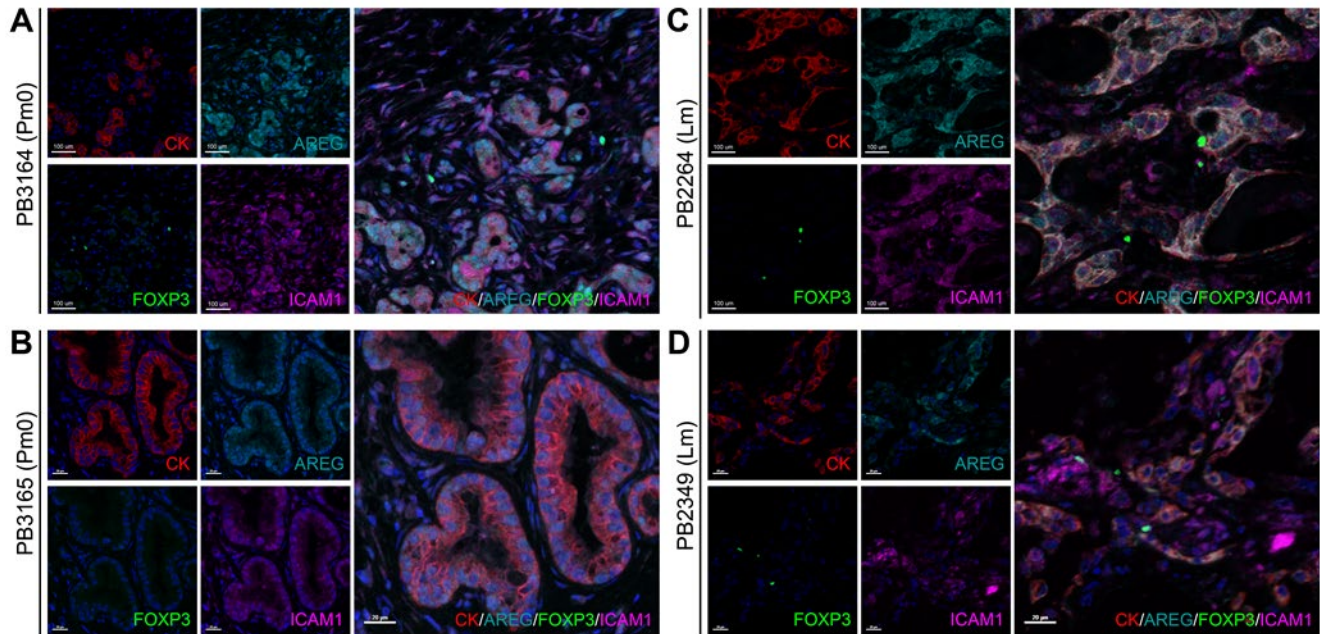

**Fig. S11** Receptor-ligand interactions between ductal cancer cells and regulatory T cells (Tregs) are examined in primary pancreas (Pm0, **A** and **B**) and liver metastasis (Lm, **C** and **D**) tissues by multiplex immunohistochemistry. AREG (cyan)-ICAM1 (magenta); Ductal cancer cells are stained with pan-cytokeratin (CK, red), and Tregs are stained with FOXP3 (green). Nuclei were counterstained with DAPI (blue): scale bar, 20  $\mu$ m.

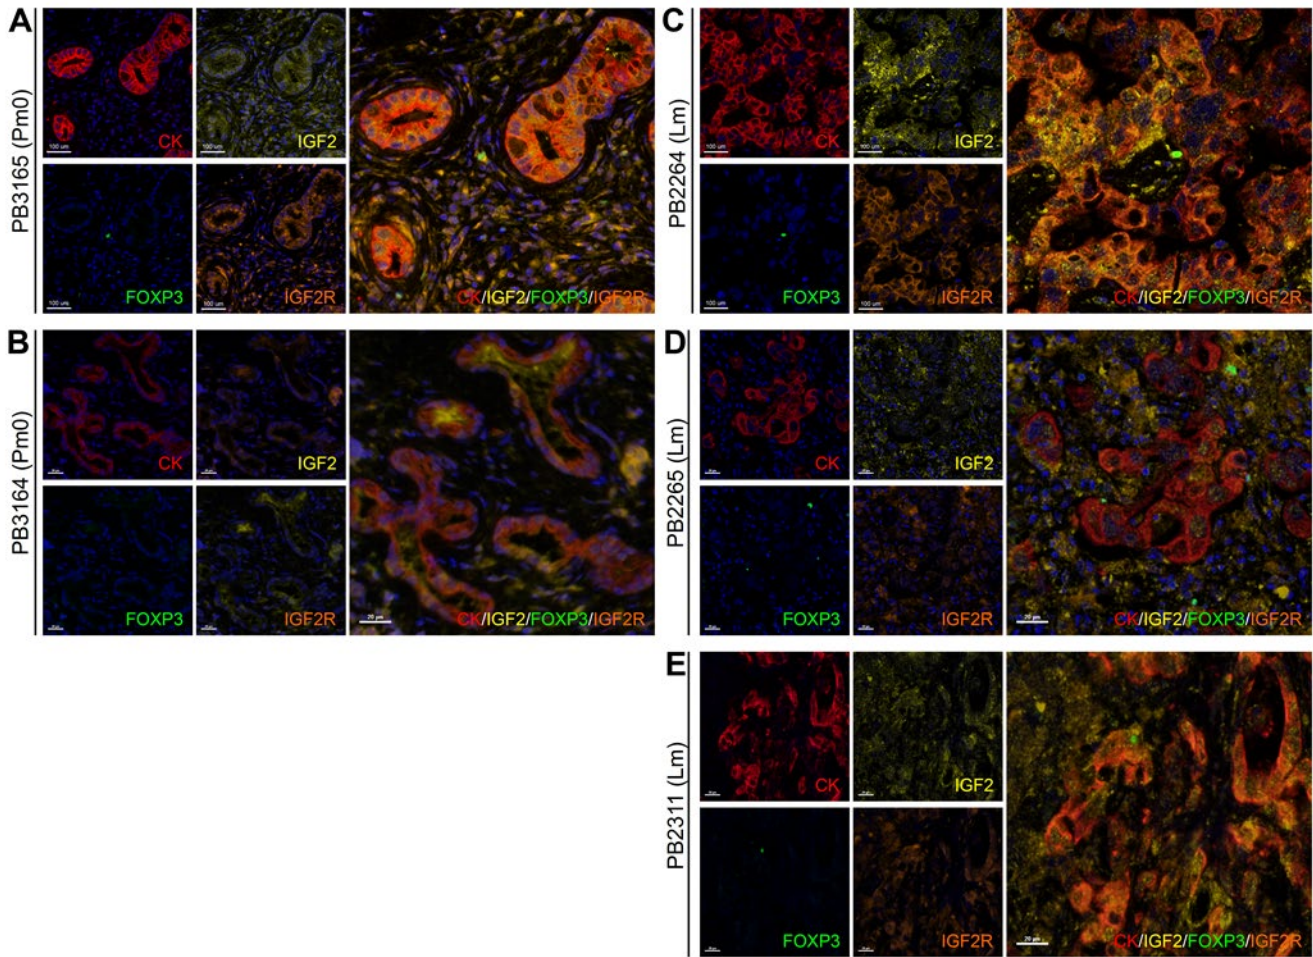

**Fig. S12** Receptor-ligand interactions between ductal cancer cells and regulatory T cells (Tregs) are examined in primary pancreas (Pm0, **A** and **B**) and liver metastasis (Lm, **C-E**) tissues by multiplex immunohistochemistry. IGF2 (yellow)-IGF2R (orange); Ductal cancer cells are stained with pan-cytokeratin (CK, red), and Tregs are stained with FOXP3 (green). Nuclei were counterstained with DAPI (blue): scale bar, 20  $\mu$ m.

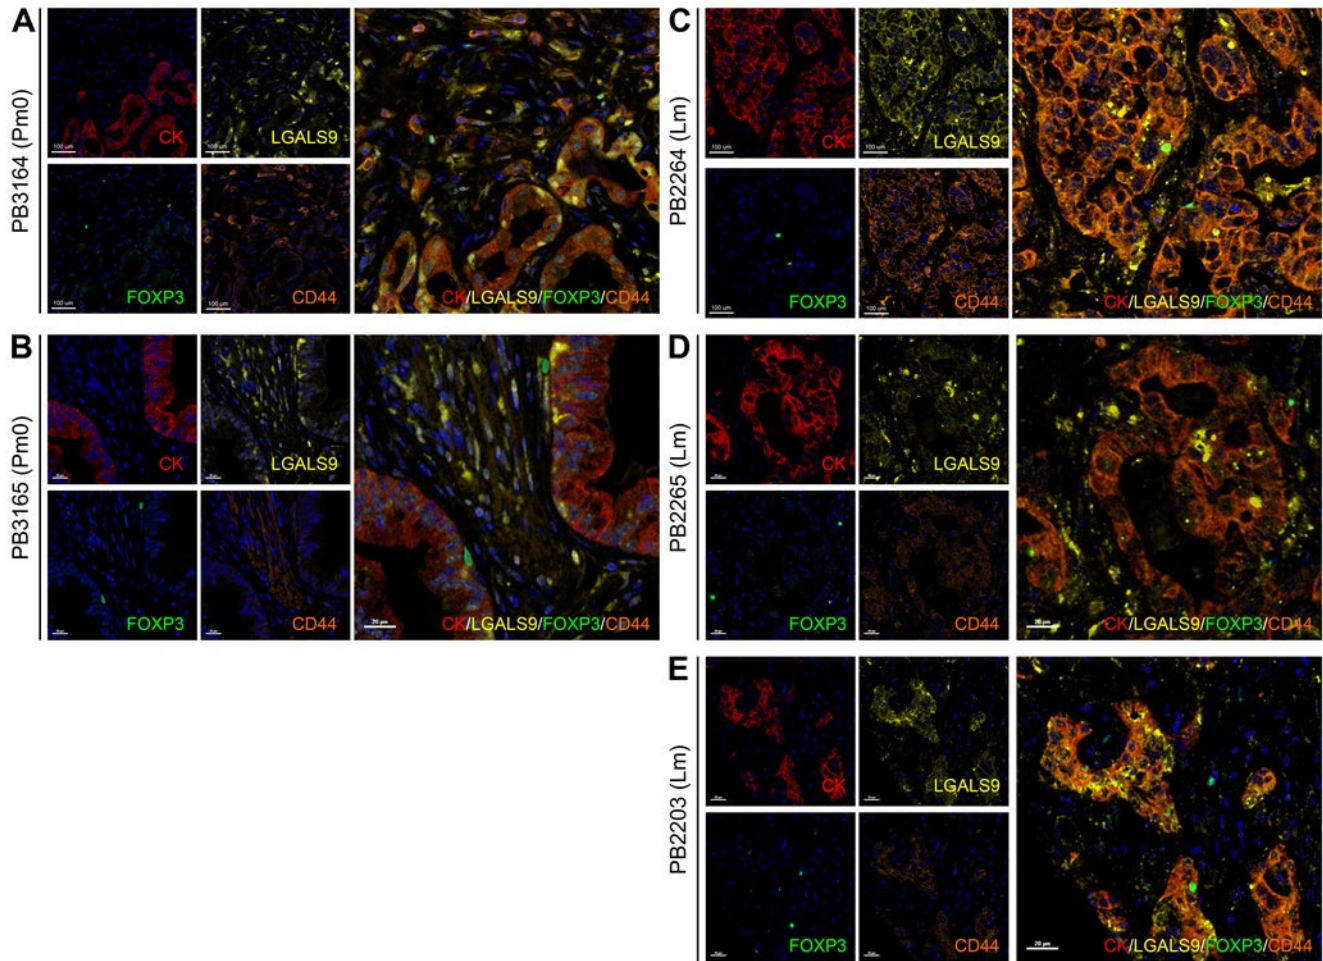

**Fig. S13** Receptor-ligand interactions between ductal cancer cells and regulatory T cells (Tregs) are examined in primary pancreas (Pm0, **A-C**) and liver metastasis (Lm, **D-F**) tissues by multiplex immunohistochemistry. LGALS9 (yellow)-CD44 (orange); Ductal cancer cells are stained with pan-cytokeratin (CK, red), and Tregs are stained with FOXP3 (green). Nuclei were counterstained with DAPI (blue): scale bar, 20  $\mu$ m.

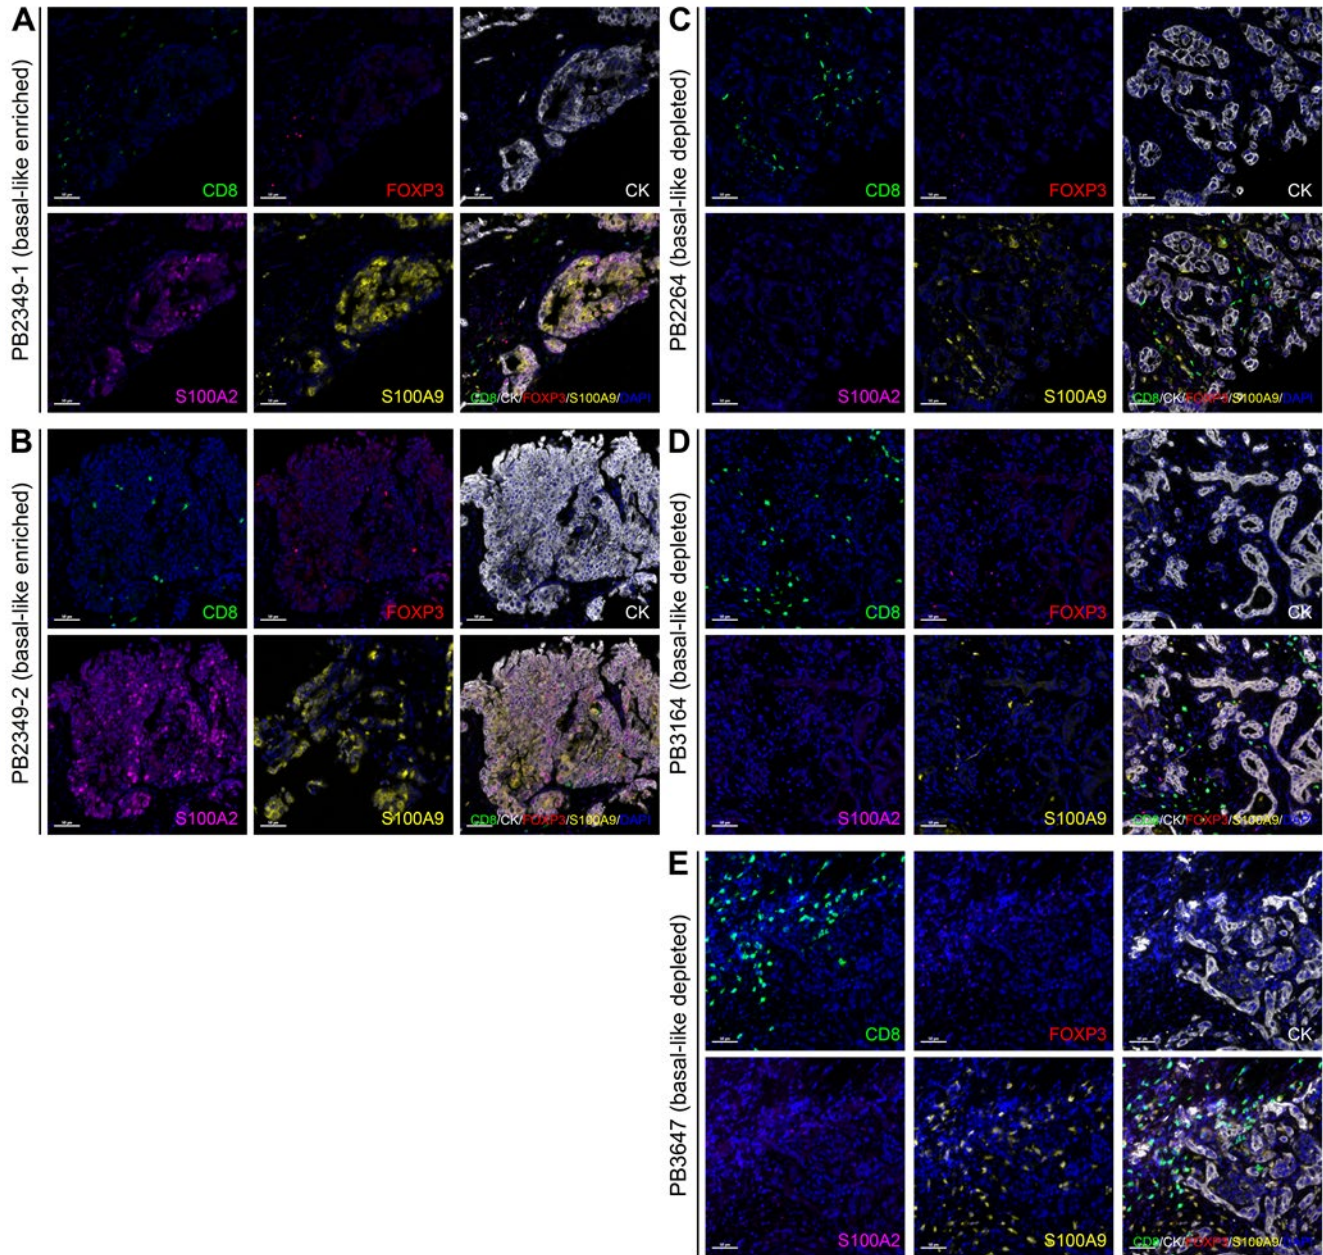

**Fig. S14** T cell distribution and S100A9 expression in basal-like and classical PDAC tissues.

Multiplex IHC showing the expression of S100A9 (yellow) and the distribution of T cells in basal-like enriched (**A** and **B**) and depleted (**C-D**) PDAC tissues. CD8 (green) for cytotoxic T cells, FOXP3 (red) for regulatory T cells, pan-cytokeratin (CK, white) for ductal cancer cells, S100A2 (magenta) for basal-like ductal cells and DAPI (blue) for nuclei were co-stained. Scale bar, 50  $\mu$ m.

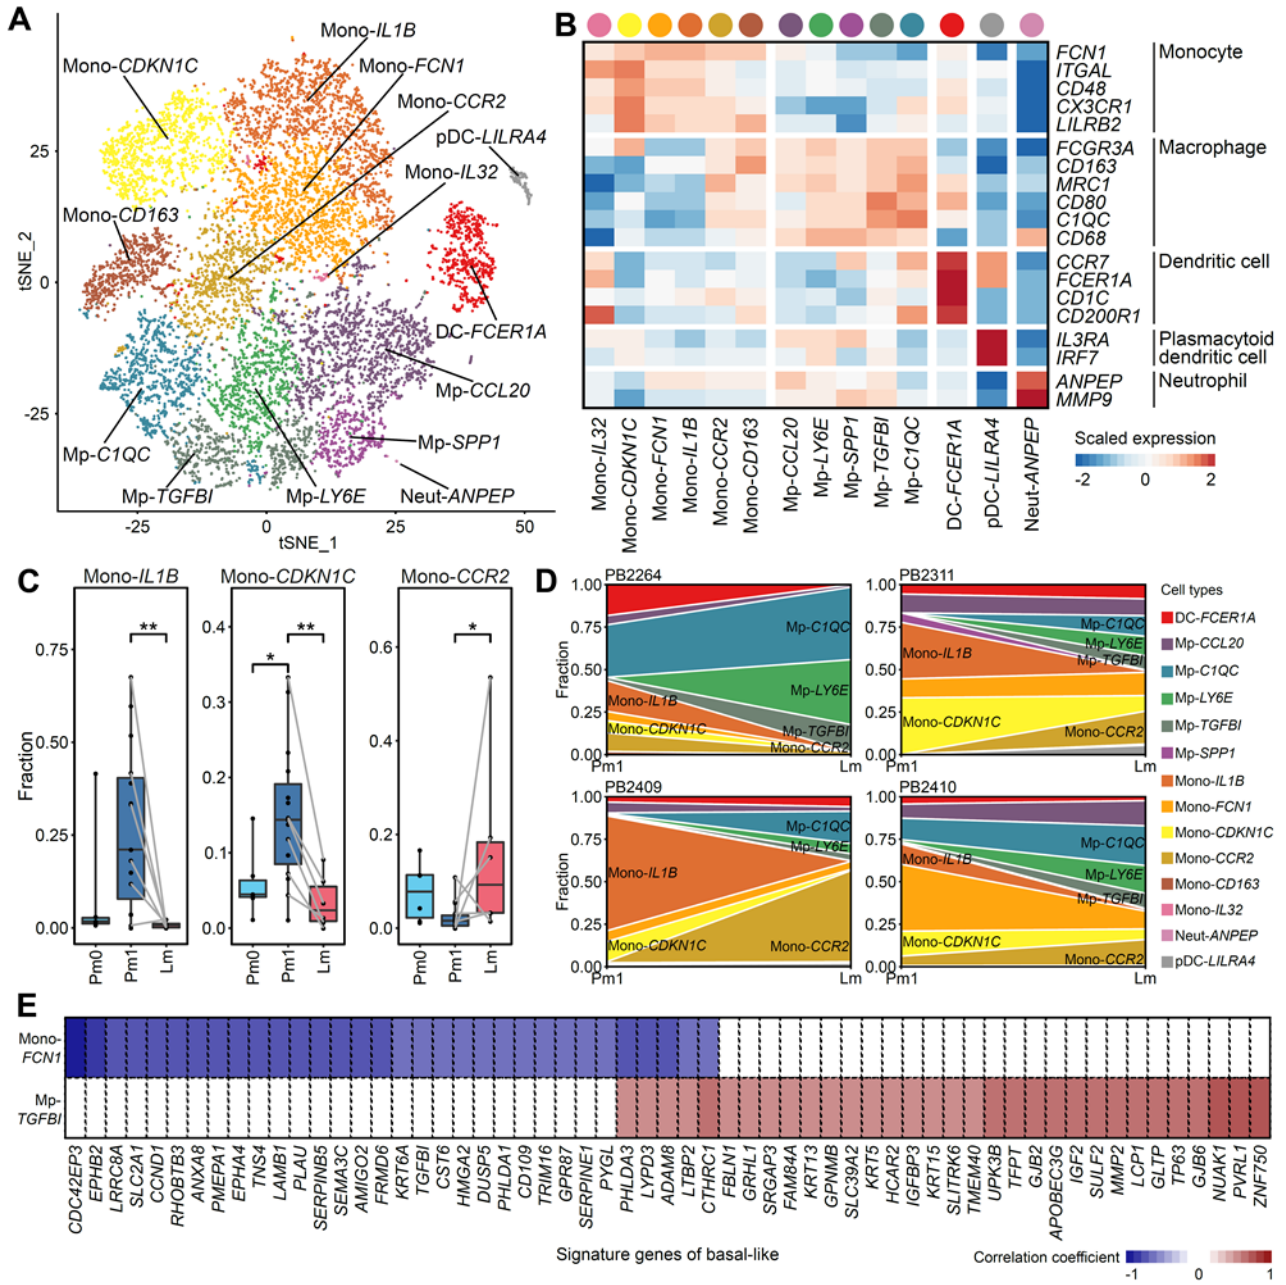

**Fig. S15** Myeloid subclusters in the primary PDAC mass and matched liver metastasis. **A**, t-SNE projections showing 14 subclusters of myeloid cells. Each point is color-coded by a cluster. **B**, Heatmap showing the expression level of cell type markers in each myeloid subcluster. **C**, Box plots indicating the percentage differences in myeloid subclusters among origins (two-sided Wilcoxon rank sum test:  $*P < 0.05$ ,  $**P < 0.01$ ,  $***P < 0.001$ ). Samples from the same patients were connected by solid lines. **D**, Area plots showing the change in the composition of the myeloid subclusters by origin for each patient. **E**, Pearson correlation between the expression level of basal-like signature genes in the ductal cells and the fractions of Mp-*TGFBI* and Mono-*FCN1* in myeloid cells.

## REFERENCES

1. Krieger TG, Le Blanc S, Jabs J, Ten FW, Ishaque N, Jechow K, Debnath O, Leonhardt CS, Giri A, Eils R, et al: **Single-cell analysis of patient-derived PDAC organoids reveals cell state heterogeneity and a conserved developmental hierarchy.** *Nat Commun* 2021, **12**:5826.
2. Chan-Seng-Yue M, Kim JC, Wilson GW, Ng K, Figueroa EF, O'Kane GM, Connor AA, Denroche RE, Grant RC, McLeod J, et al: **Transcription phenotypes of pancreatic cancer are driven by genomic events during tumor evolution.** *Nat Genet* 2020, **52**:231-240.
3. Collisson EA, Sadanandam A, Olson P, Gibb WJ, Truitt M, Gu S, Cooc J, Weinkle J, Kim GE, Jakkula L, et al: **Subtypes of pancreatic ductal adenocarcinoma and their differing responses to therapy.** *Nat Med* 2011, **17**:500-503.
4. Moffitt RA, Marayati R, Flate EL, Volmar KE, Loeza SG, Hoadley KA, Rashid NU, Williams LA, Eaton SC, Chung AH, et al: **Virtual microdissection identifies distinct tumor- and stroma-specific subtypes of pancreatic ductal adenocarcinoma.** *Nat Genet* 2015, **47**:1168-1178.
5. Bailey P, Chang DK, Nones K, Johns AL, Patch AM, Gingras MC, Miller DK, Christ AN, Bruxner TJ, Quinn MC, et al: **Genomic analyses identify molecular subtypes of pancreatic cancer.** *Nature* 2016, **531**:47-52.
6. Ko SE, Lee MW, Lim HK, Min JH, Cha DI, Kang TW, Song KD, Kim MJ, Rhim H: **The semi-erect position for better visualization of subphrenic hepatocellular carcinoma during ultrasonography examinations.** *Ultrasonography* 2021, **40**:274-280.
7. Lee MW: **Fusion imaging of real-time ultrasonography with CT or MRI for hepatic intervention.** *Ultrasonography* 2014, **33**:227-239.
8. Dobin A, Davis CA, Schlesinger F, Drenkow J, Zaleski C, Jha S, Batut P, Chaisson M, Gingeras TR: **STAR: ultrafast universal RNA-seq aligner.** *Bioinformatics* 2013, **29**:15-21.
9. Butler A, Hoffman P, Smibert P, Papalexi E, Satija R: **Integrating single-cell transcriptomic data across different conditions, technologies, and species.** *Nat Biotechnol* 2018, **36**:411-420.
10. Aran D, Looney AP, Liu L, Wu E, Fong V, Hsu A, Chak S, Naikawadi RP, Wolters PJ, Abate AR, et al: **Reference-based analysis of lung single-cell sequencing reveals a transitional profibrotic macrophage.** *Nat Immunol* 2019, **20**:163-172.
11. Vieira Braga FA, Kar G, Berg M, Carpaij OA, Polanski K, Simon LM, Brouwer S, Gomes T, Hesse L, Jiang J, et al: **A cellular census of human lungs identifies novel cell states in health and in asthma.** *Nat Med* 2019, **25**:1153-1163.
12. Zhou DC, Jayasinghe RG, Chen SQ, Herndon JM, Iglesia MD, Navale P, Wendl MC, Caravan W, Sato K, Storrs E, et al: **Spatially restricted drivers and transitional cell populations cooperate with the microenvironment in untreated and chemo-resistant pancreatic cancer.** *Nature Genetics* 2022, **54**.
13. Cable DM, Murray E, Zou LLS, Goeva A, Macosko EZ, Chen F, Irizarry RA: **Robust decomposition of cell type mixtures in spatial transcriptomics.** *Nature Biotechnology* 2022, **40**:517-+.
14. Young MD, Behjati S: **SoupX removes ambient RNA contamination from droplet-based single-cell RNA sequencing data.** *Gigascience* 2020, **9**.
15. Wolock SL, Lopez R, Klein AM: **Scrublet: Computational Identification of Cell Doublets in Single-Cell Transcriptomic Data.** *Cell Syst* 2019, **8**:281-291 e289.
16. Kotliar D, Veres A, Nagy MA, Tabrizi S, Hodis E, Melton DA, Sabeti PC: **Identifying gene expression programs of cell-type identity and cellular activity with single-cell RNA-Seq.** *Elife* 2019, **8**.

17. Gao R, Bai S, Henderson YC, Lin Y, Schalck A, Yan Y, Kumar T, Hu M, Sei E, Davis A, et al: **Delineating copy number and clonal substructure in human tumors from single-cell transcriptomes.** *Nat Biotechnol* 2021, **39**:599-608.
18. Li H, van der Leun AM, Yofe I, Lubling Y, Gelbard-Solodkin D, van Akkooi ACJ, van den Braber M, Rozeman EA, Haanen J, Blank CU, et al: **Dysfunctional CD8 T Cells Form a Proliferative, Dynamically Regulated Compartment within Human Melanoma.** *Cell* 2019, **176**:775-789 e718.
19. Kuleshov MV, Jones MR, Rouillard AD, Fernandez NF, Duan Q, Wang Z, Koplev S, Jenkins SL, Jagodnik KM, Lachmann A, et al: **Enrichr: a comprehensive gene set enrichment analysis web server 2016 update.** *Nucleic Acids Res* 2016, **44**:W90-97.
20. Qiu X, Hill A, Packer J, Lin D, Ma YA, Trapnell C: **Single-cell mRNA quantification and differential analysis with Censur.** *Nat Methods* 2017, **14**:309-315.
21. Efremova M, Vento-Tormo M, Teichmann SA, Vento-Tormo R: **CellPhoneDB: inferring cell-cell communication from combined expression of multi-subunit ligand-receptor complexes.** *Nat Protoc* 2020, **15**:1484-1506.
22. Hwang WL, Jagadeesh KA, Guo JA, Hoffman HI, Yadollahpour P, Reeves JW, Mohan R, Drokhyansky E, Van Wittenberghe N, Ashenberg O, et al: **Single-nucleus and spatial transcriptome profiling of pancreatic cancer identifies multicellular dynamics associated with neoadjuvant treatment.** *Nat Genet* 2022, **54**:1178-1191.
23. Weinstein JN, Collisson EA, Mills GB, Shaw KRM, Ozenberger BA, Ellrott K, Shmulevich I, Sander C, Stuart JM, Network CGAR: **The Cancer Genome Atlas Pan-Cancer analysis project.** *Nature Genetics* 2013, **45**:1113-1120.
24. Wang X, Park J, Susztak K, Zhang NR, Li M: **Bulk tissue cell type deconvolution with multi-subject single-cell expression reference.** *Nat Commun* 2019, **10**:380.
25. Aibar S, Gonzalez-Blas CB, Moerman T, Huynh-Thu VA, Imrichova H, Hulselmans G, Rambow F, Marine JC, Geurts P, Aerts J, et al: **SCENIC: single-cell regulatory network inference and clustering.** *Nat Methods* 2017, **14**:1083-1086.
